# Supplementary material for: Inference of Candidate Germline Mutator Loci in Humans from Genome-Wide Haplotype Data
Source: PubMed Central journal article supplement (PMC5283766; doi:10.1371/journal.pgen.1006549), 2017-01-17

# Locus: Chr1, 202Mb

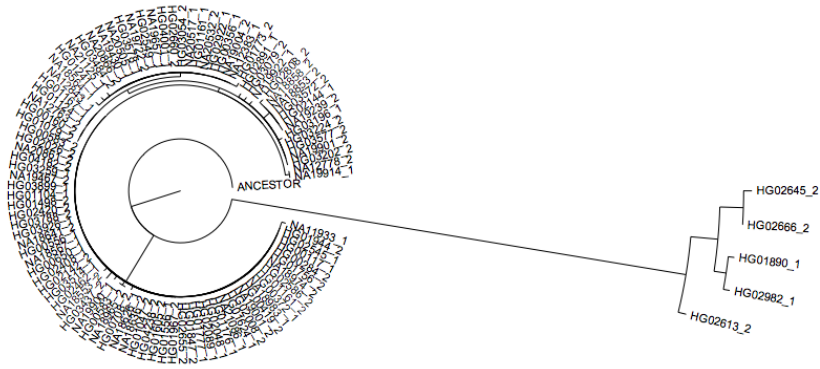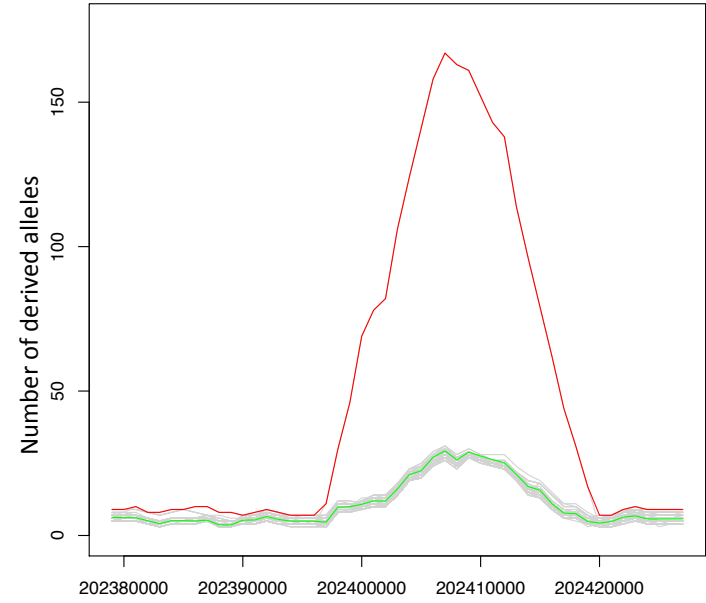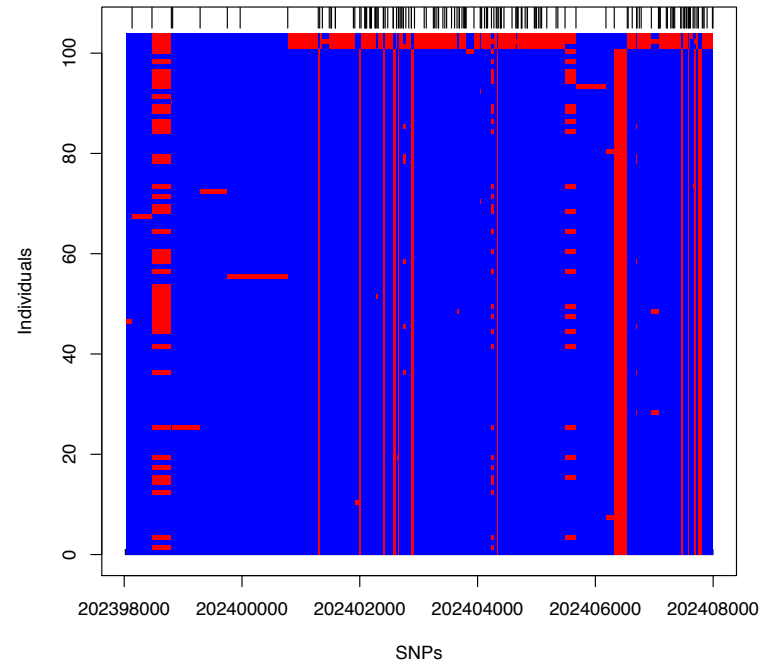

# Locus: Chr18, 15Mb

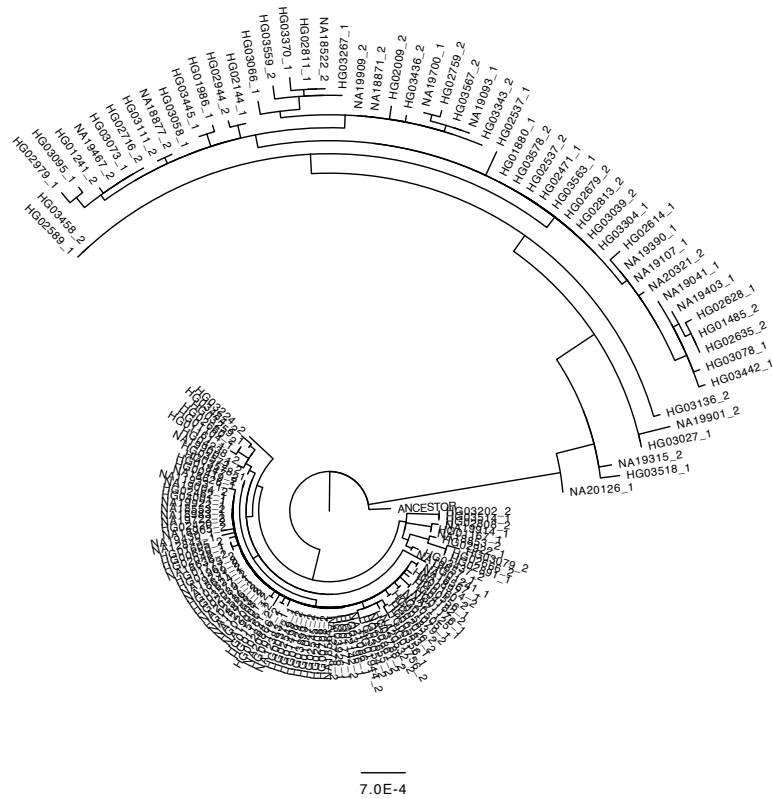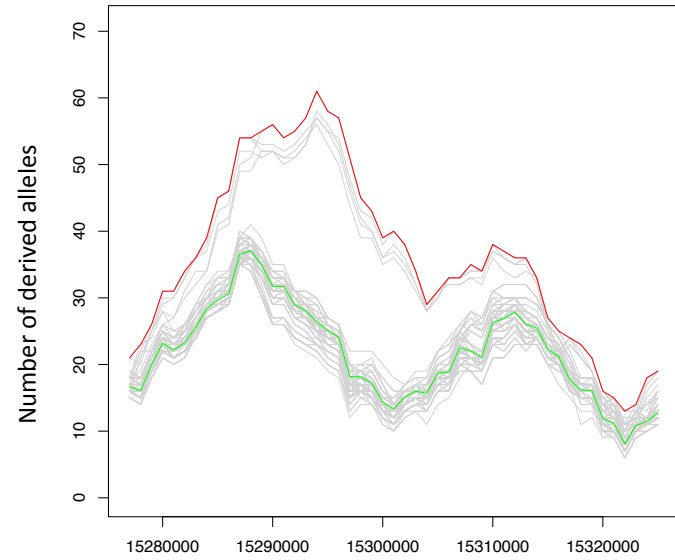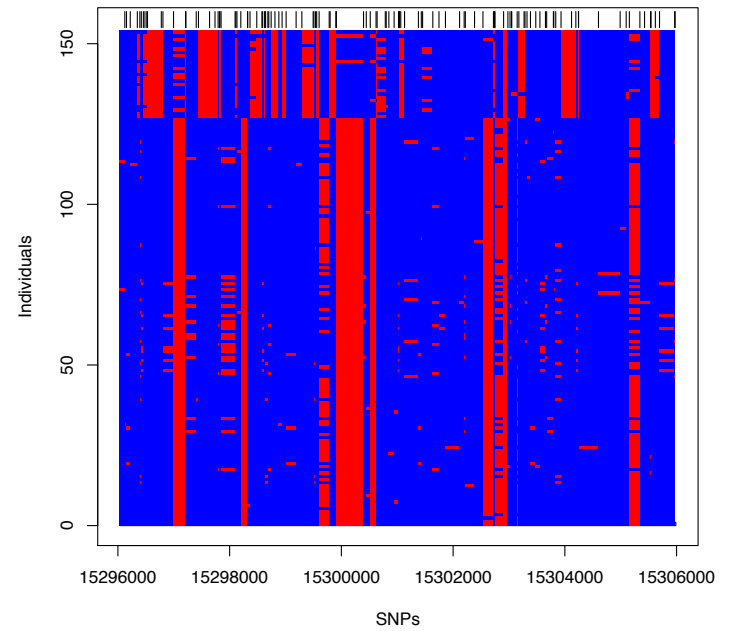

# Locus: Chr12, 96.5Mb

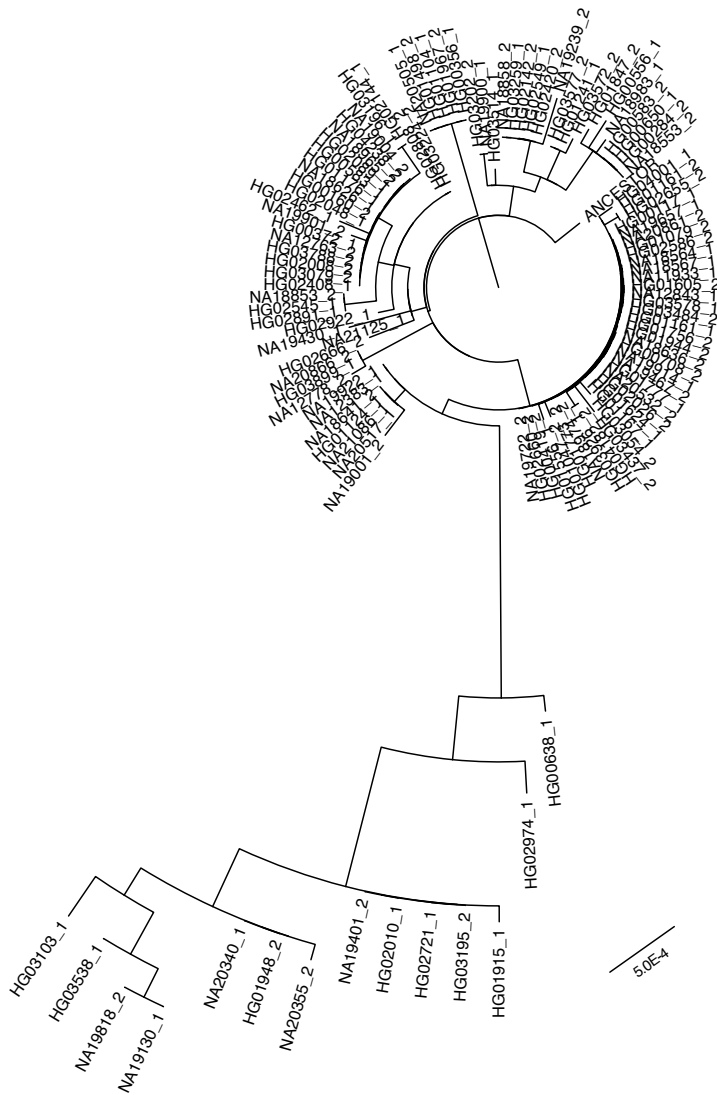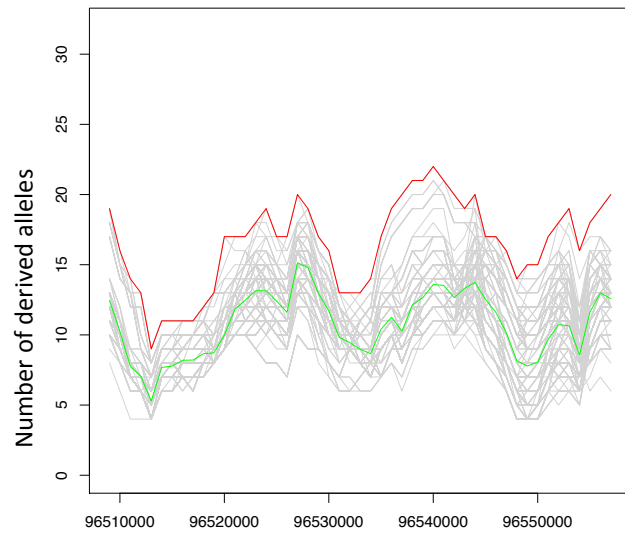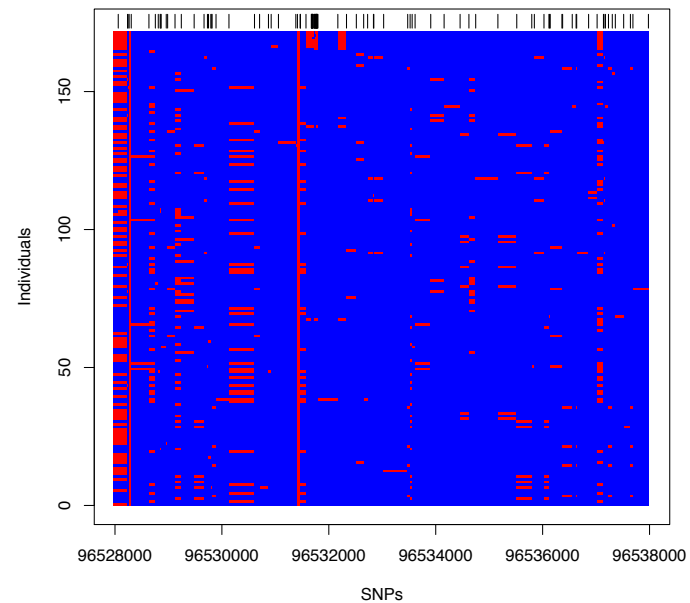

# Locus: Chr2, 18Mb

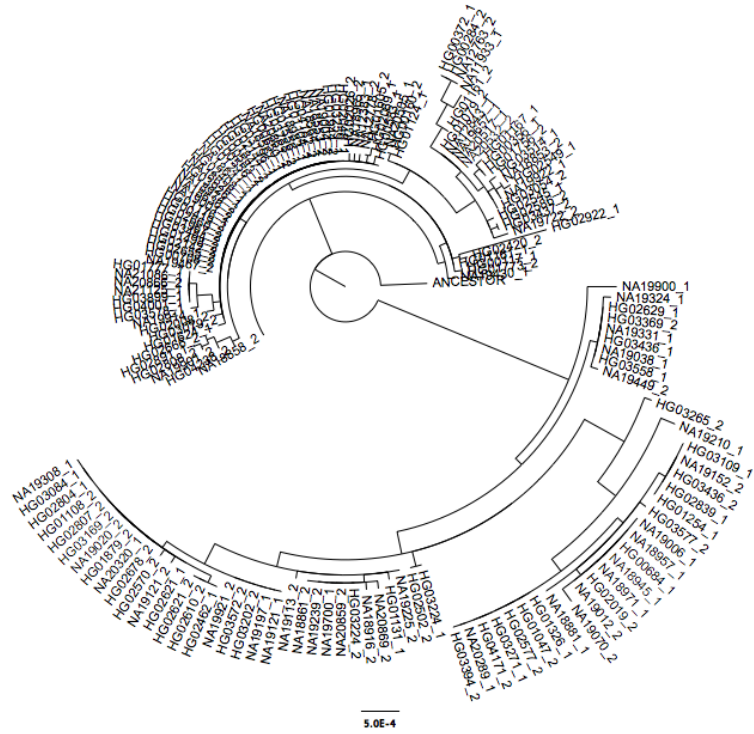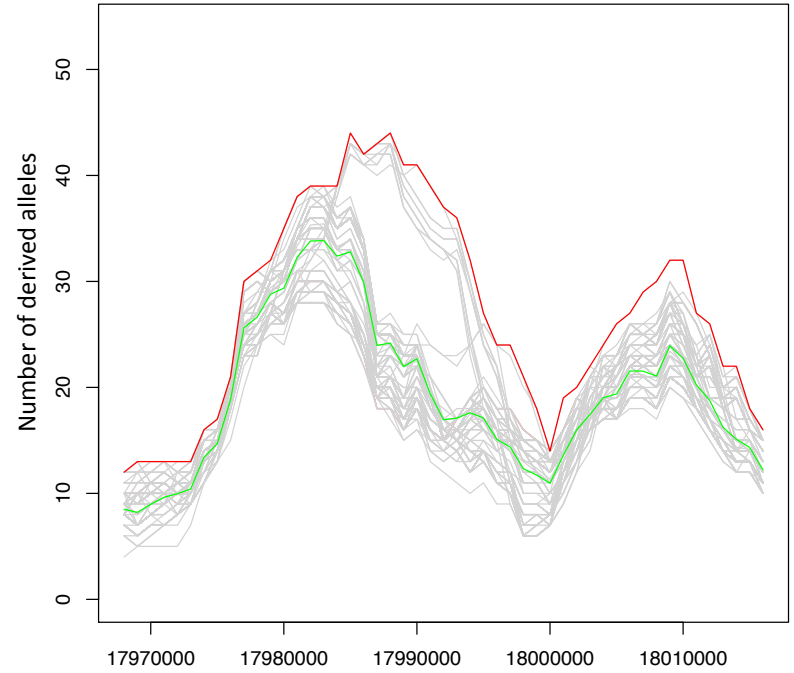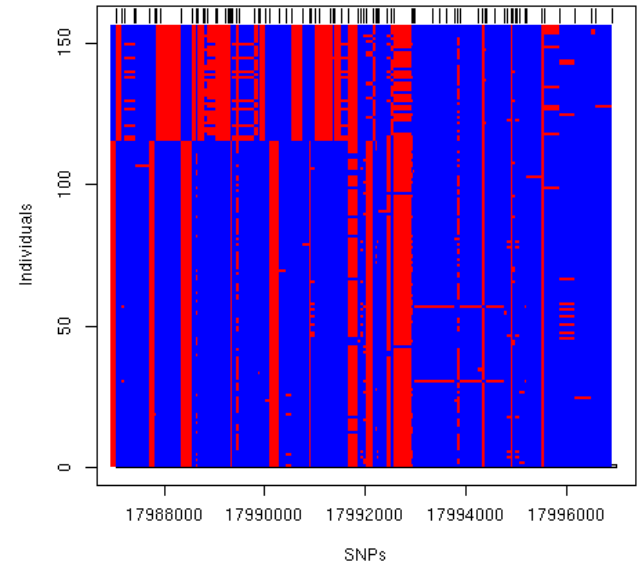



# Locus: Chr11, 1.4Mb

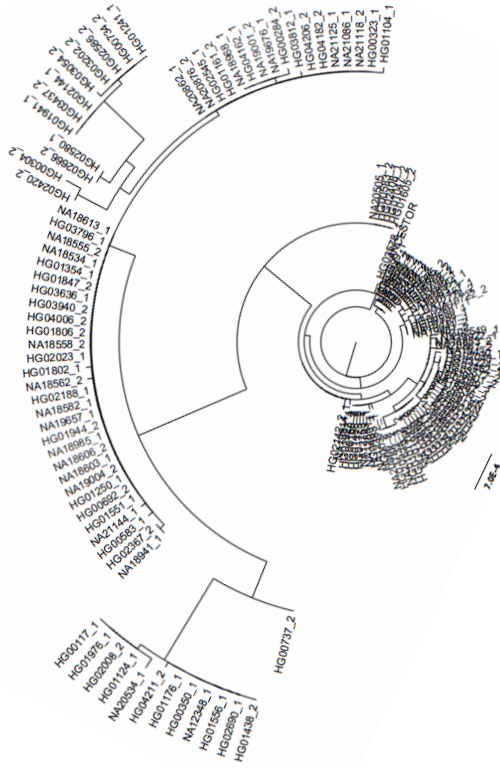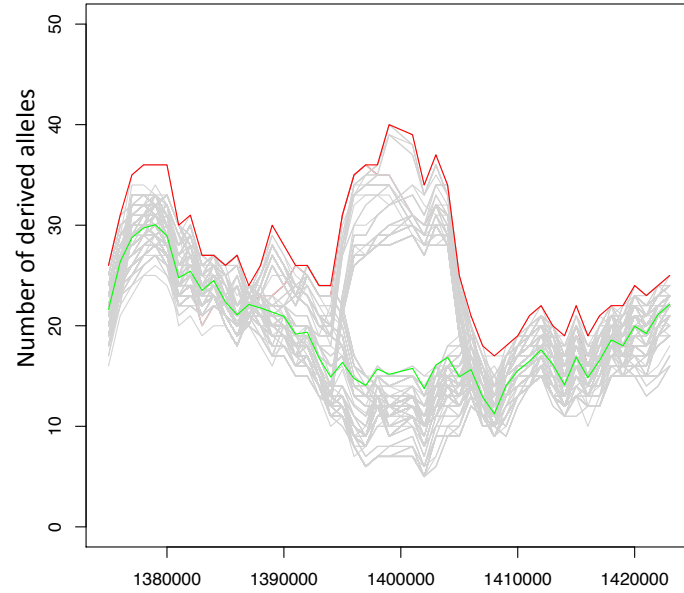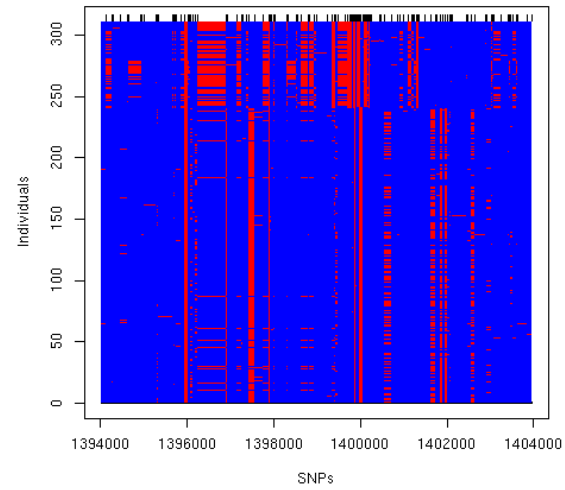







# Locus: Chr18, 24Mb

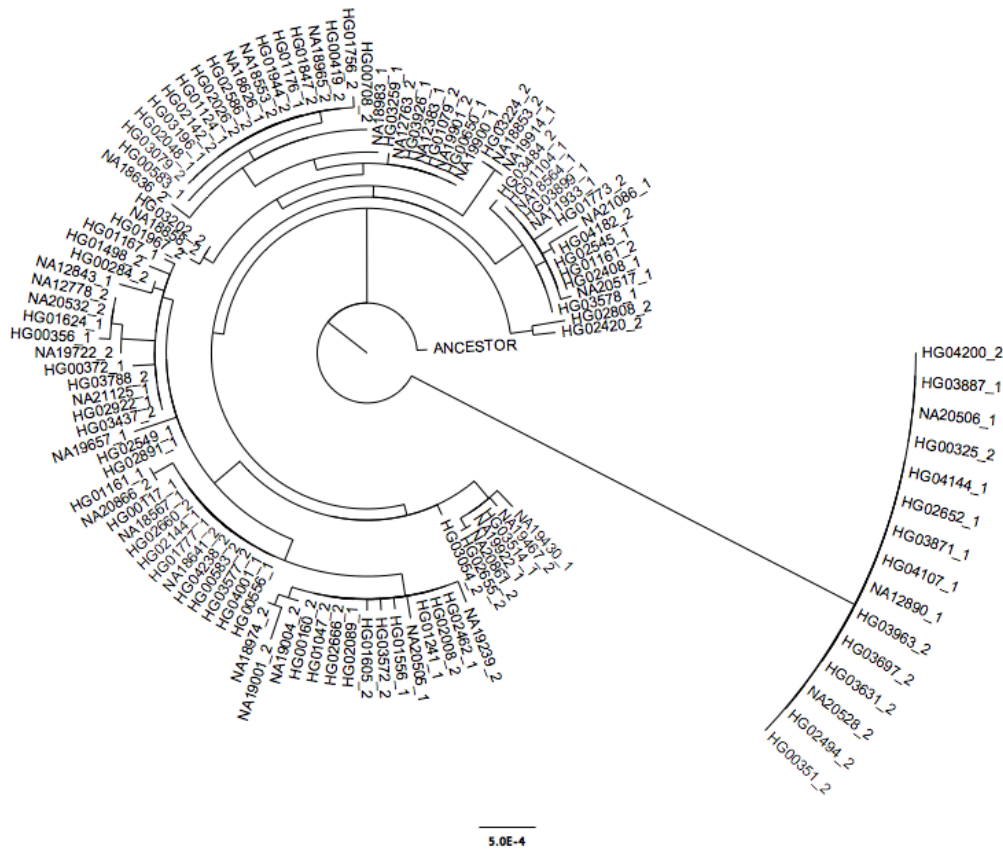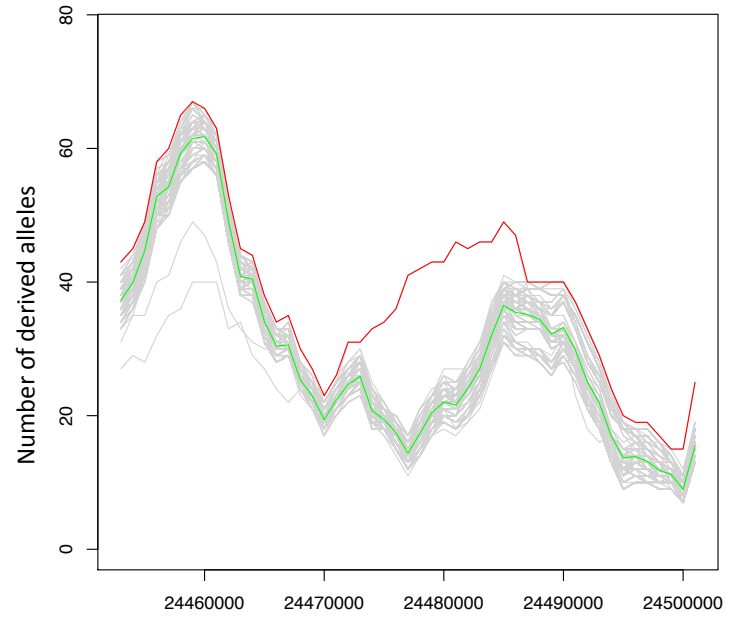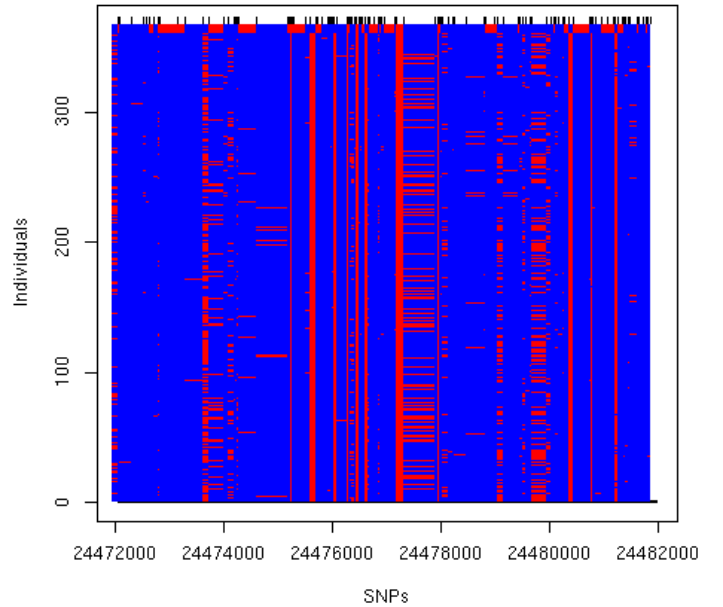

# Locus: Chr12, 87Mb

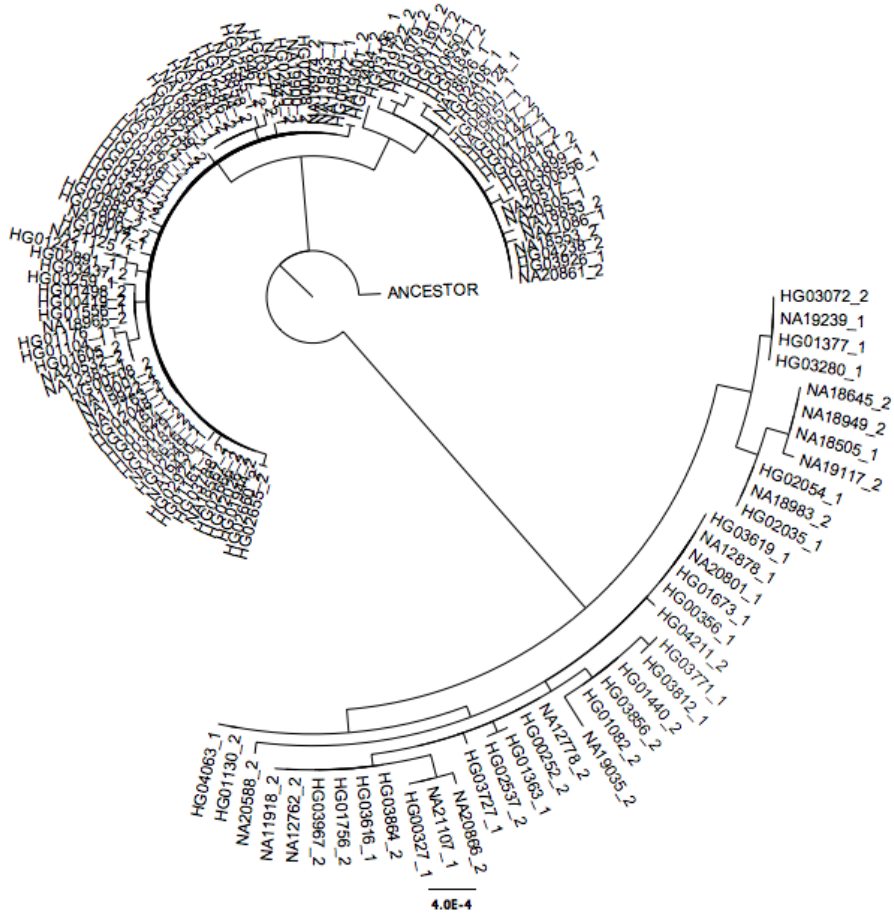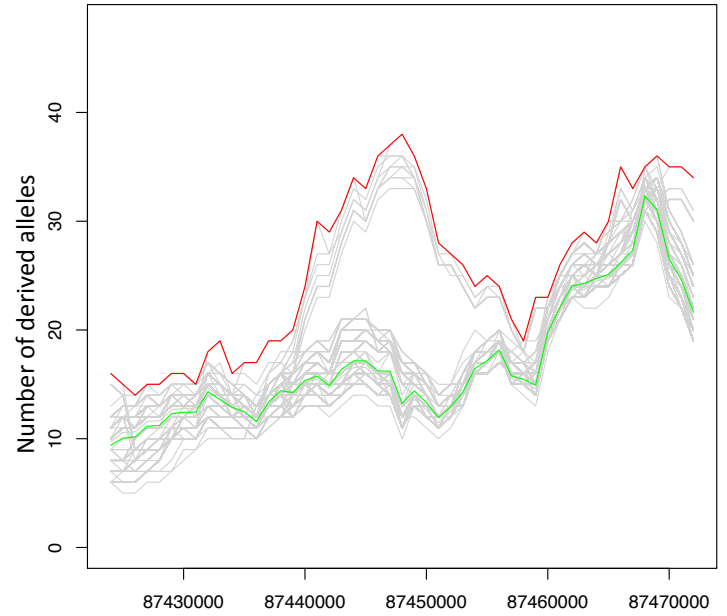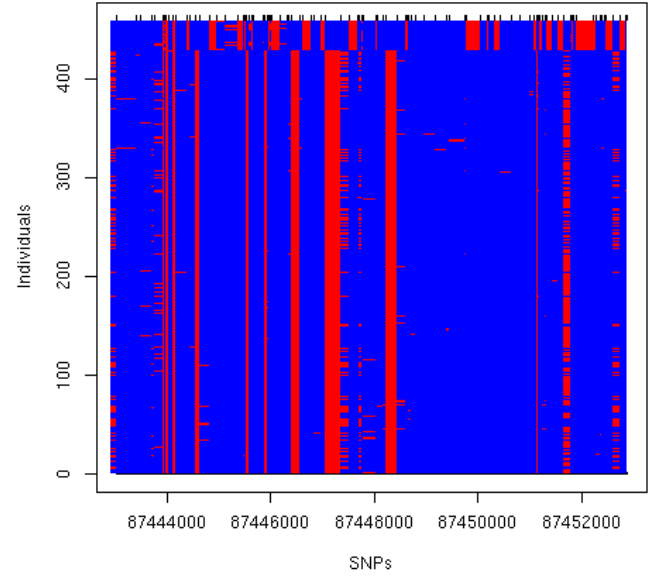

# Locus: Chr1, 193Mb

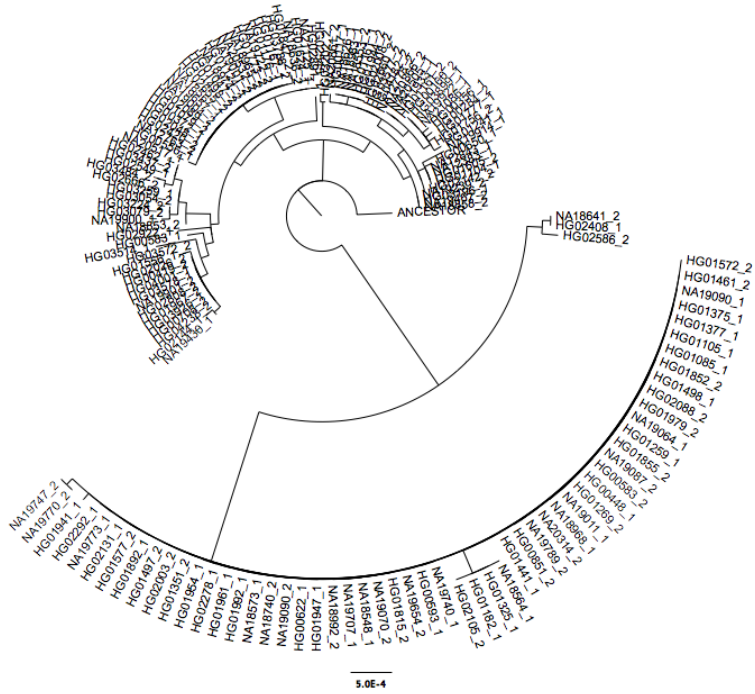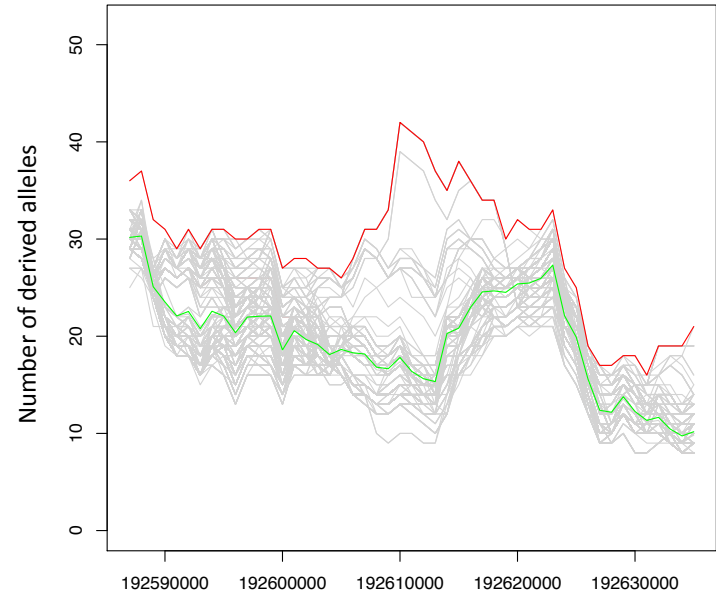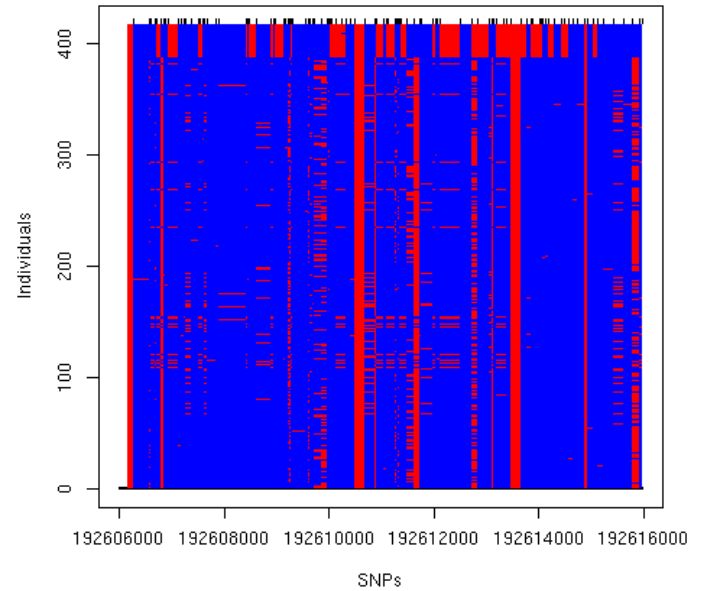



# Locus: Chr17, 15.9Mb

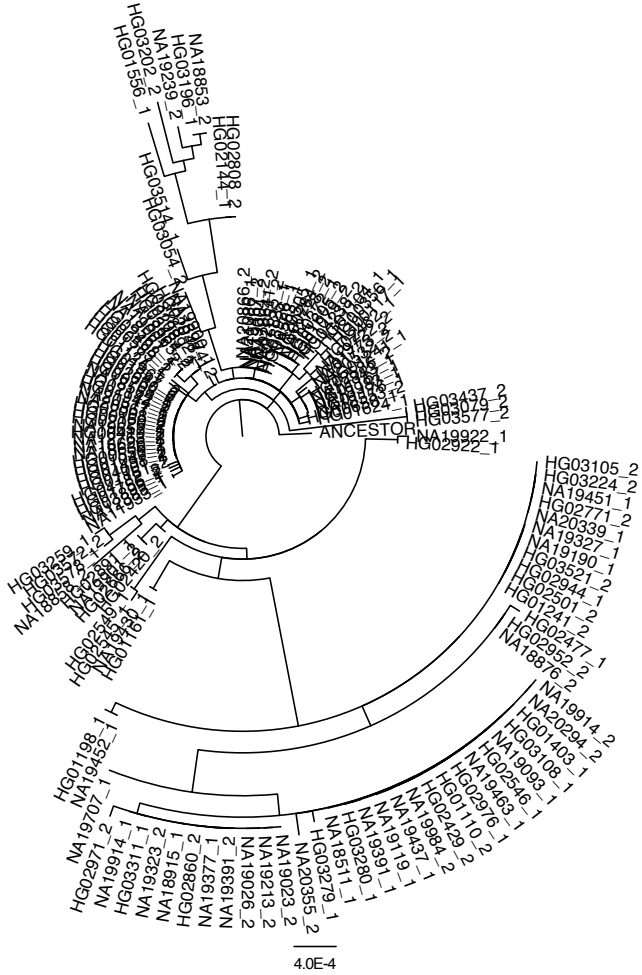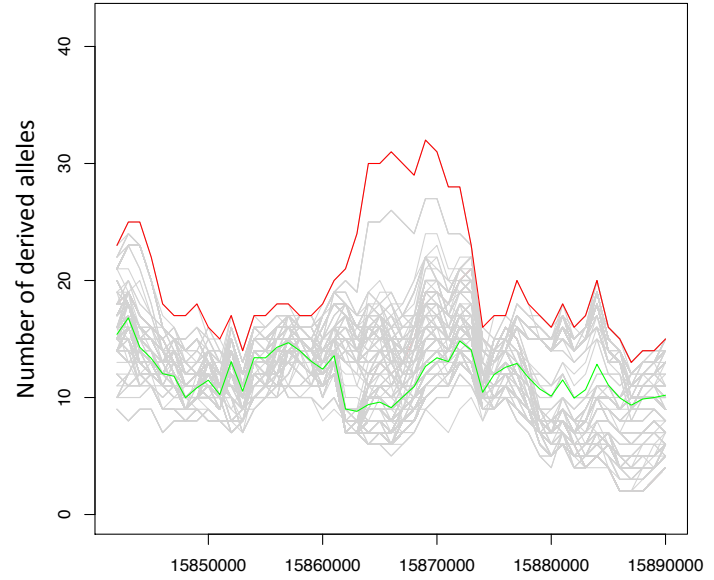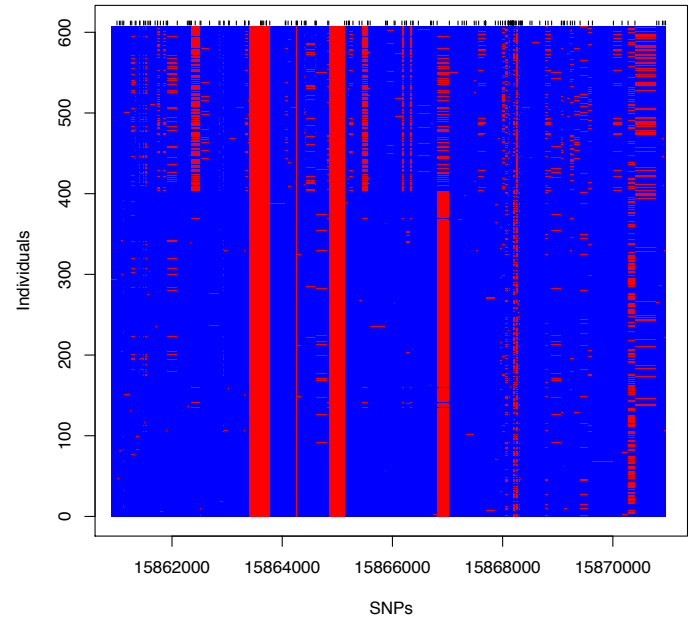

# Locus: Chr14, 90Mb

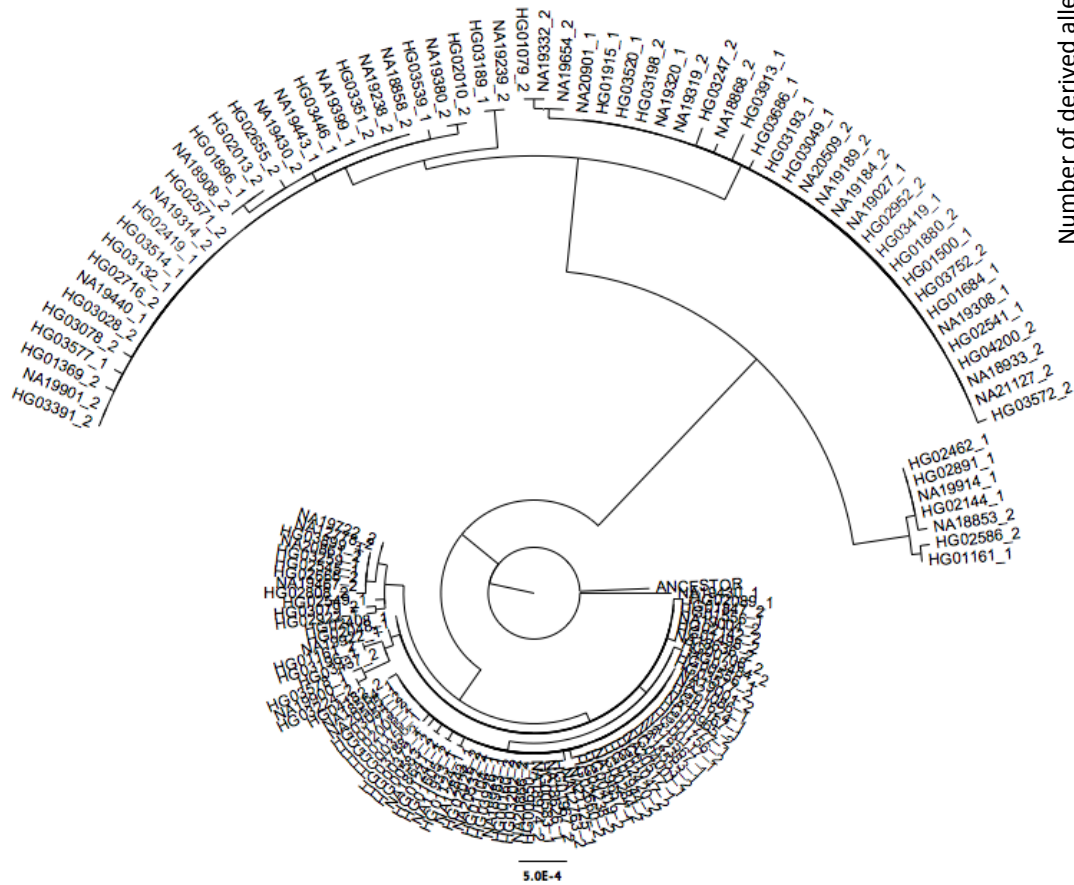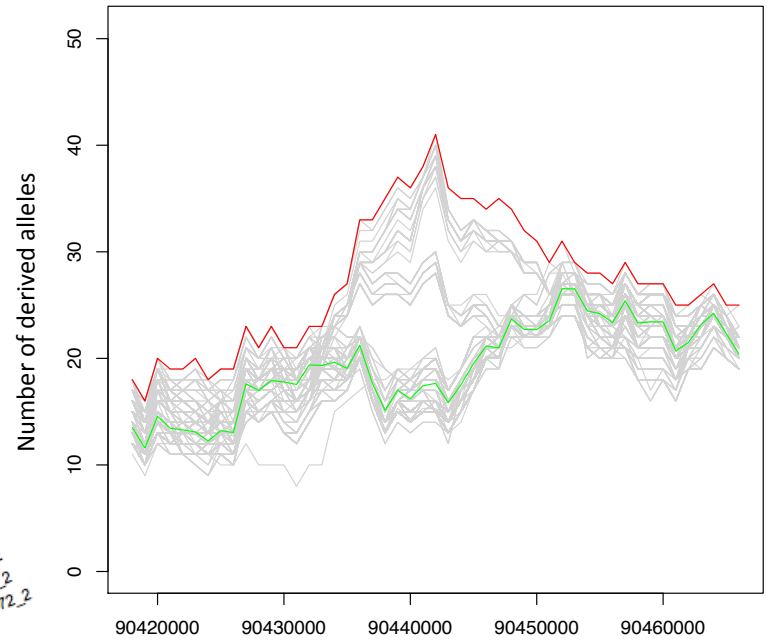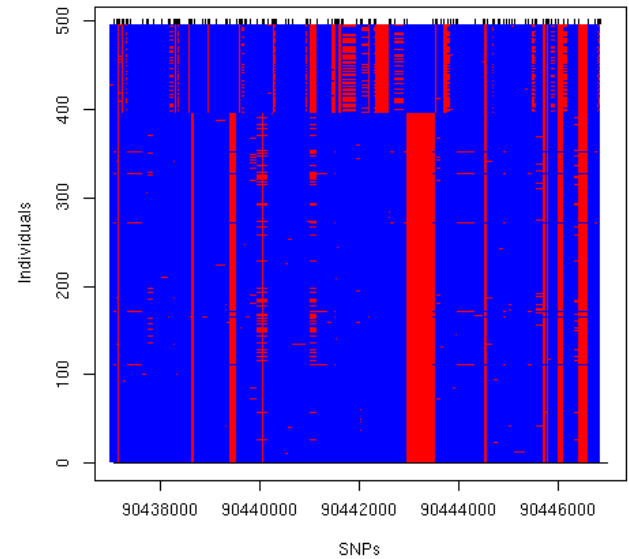

# Locus: Chr6, 130.9Mb

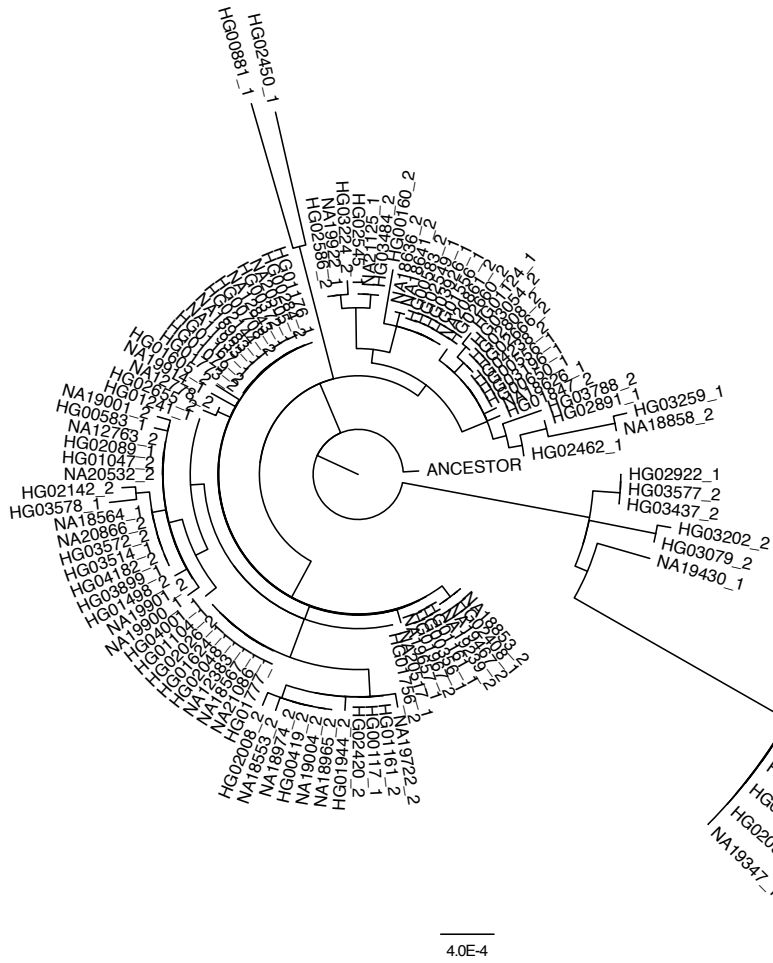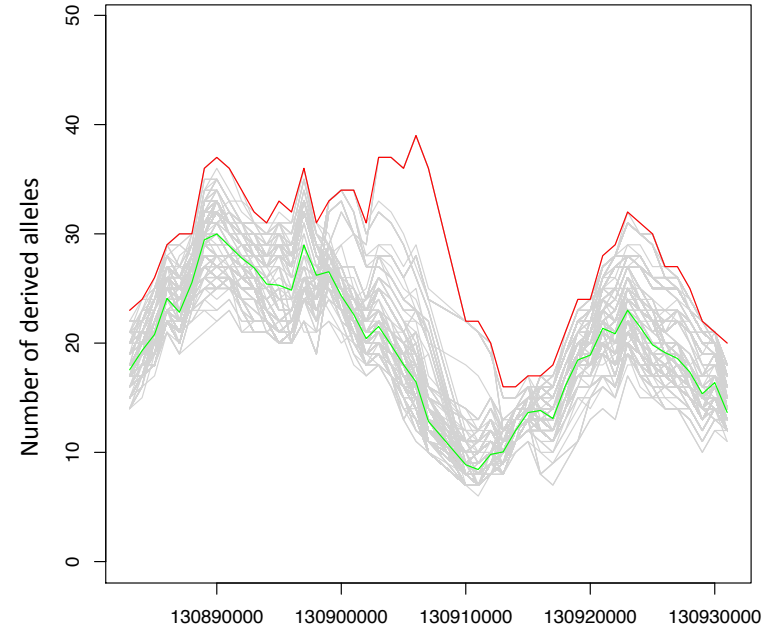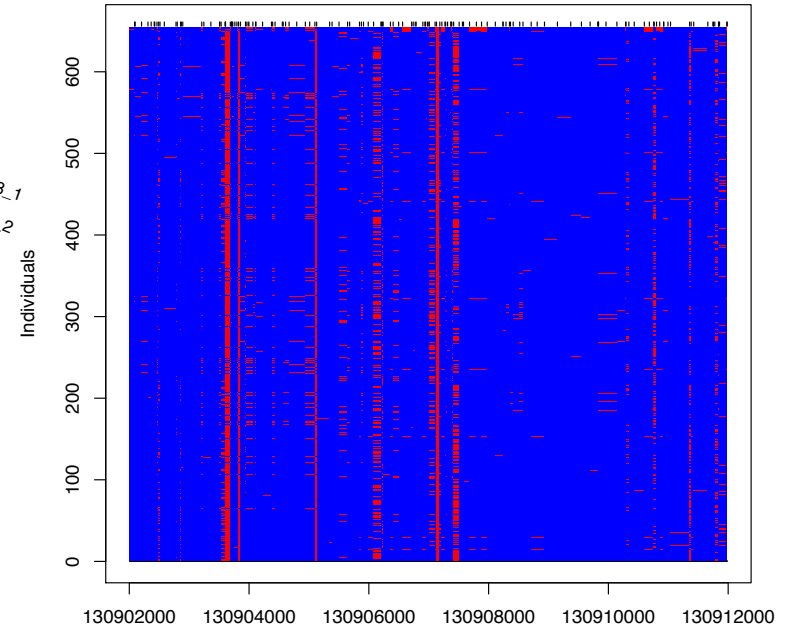

# Locus: Chr8, 42Mb

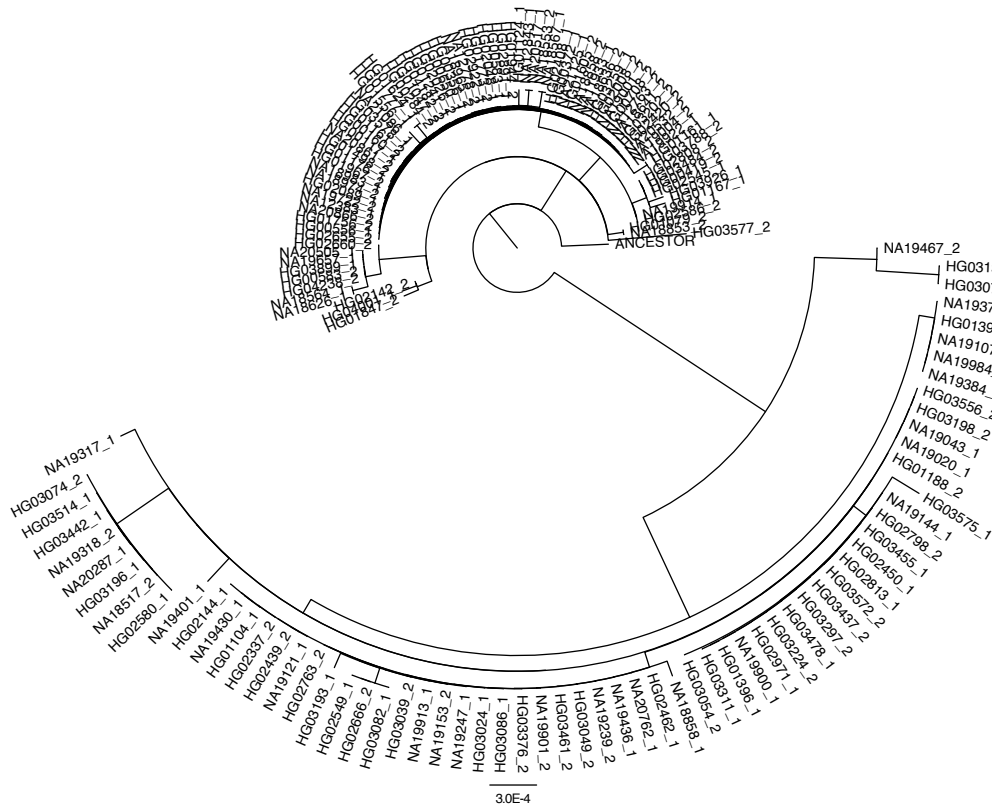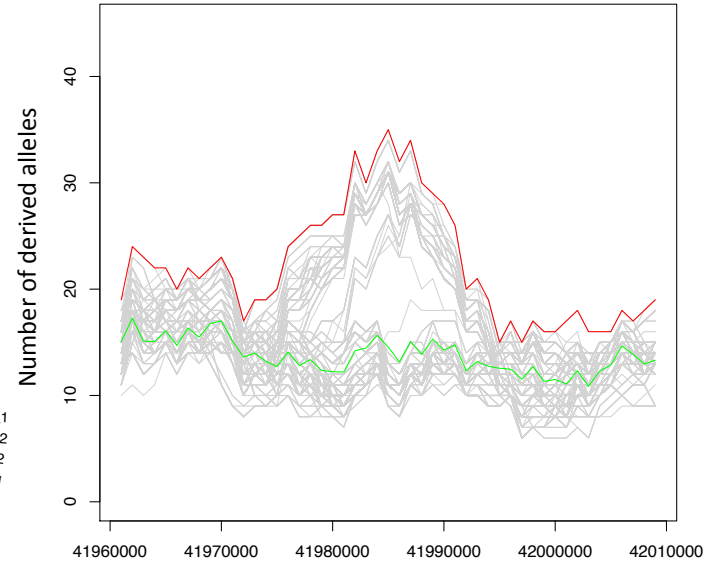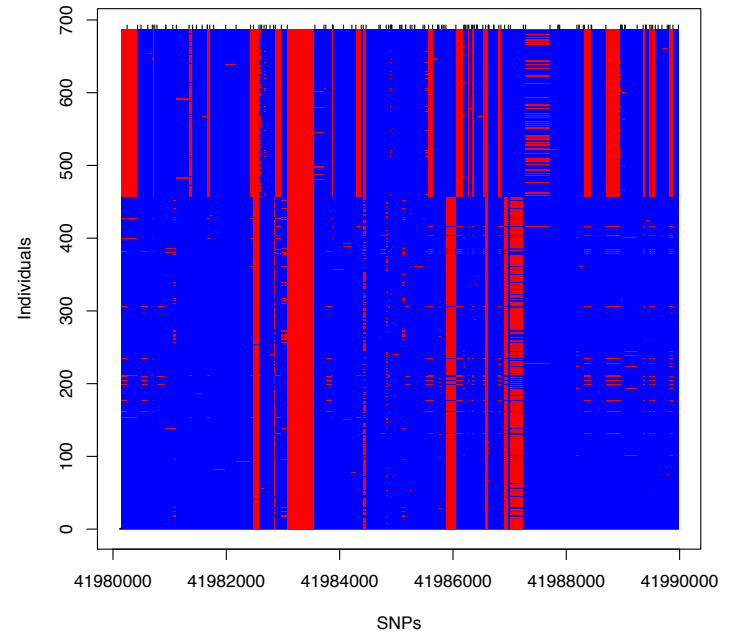



# Locus: Chr10, 25Mb

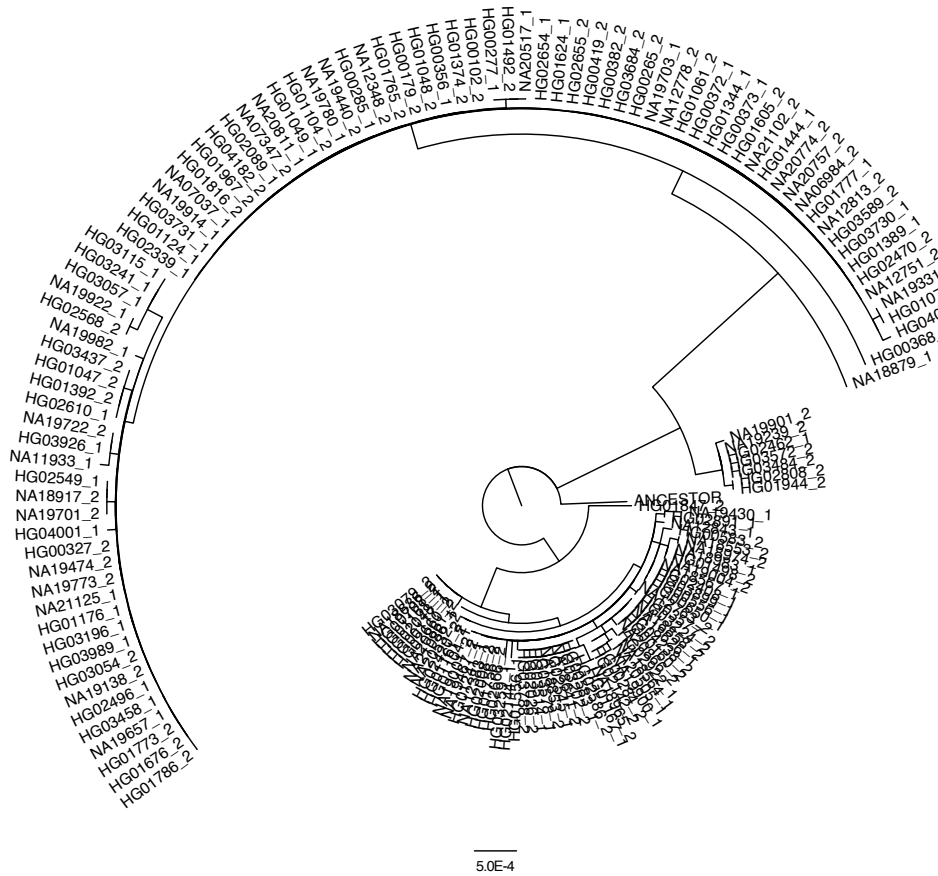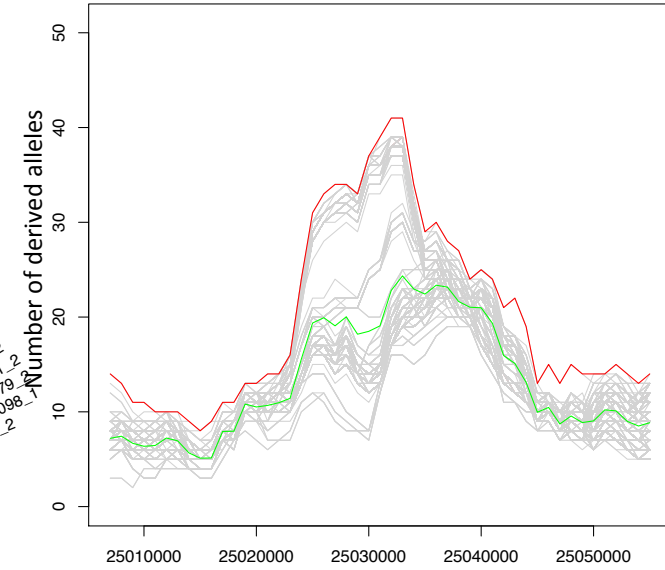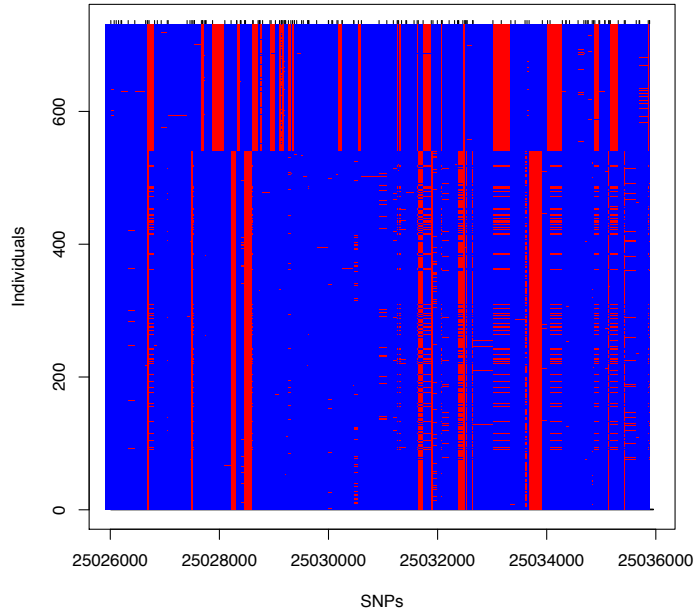

# Locus: Chr21, 24.1Mb

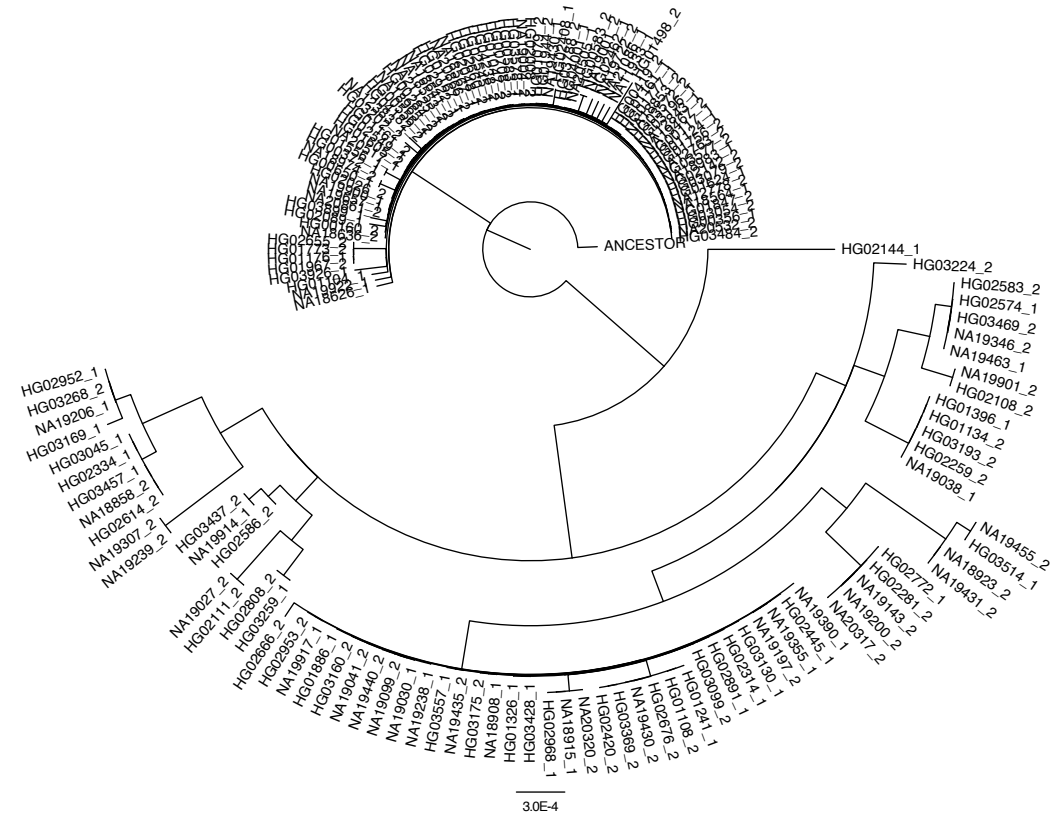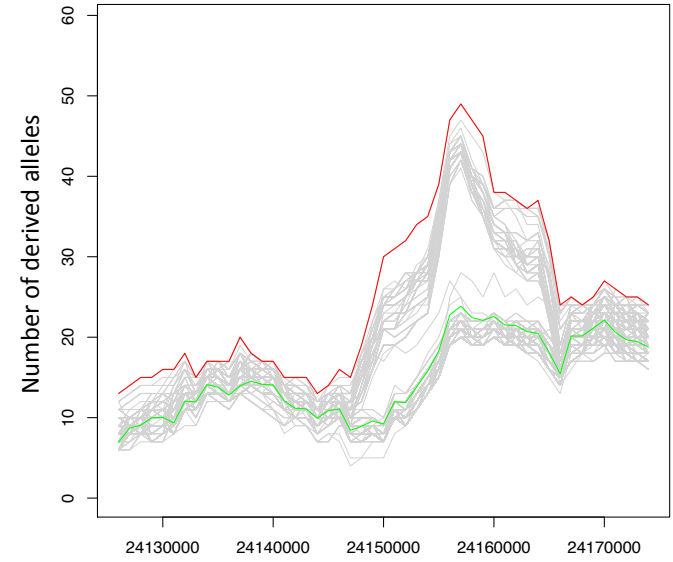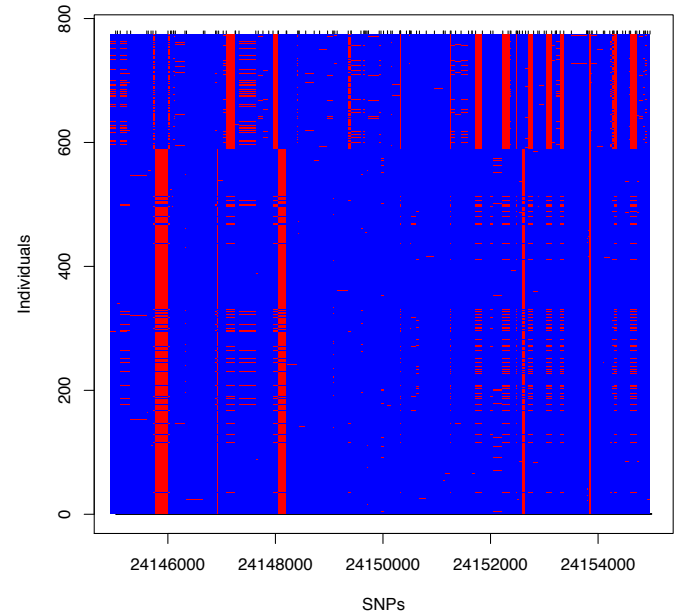

Supplement: pgen.1006549.s003.pdf [file pgen.1006549.s003.pdf]
