# Supplementary material for: Inference of Candidate Germline Mutator Loci in Humans from Genome-Wide Haplotype Data
Source: PubMed Central journal article supplement (PMC5283766; doi:10.1371/journal.pgen.1006549), 2017-01-17

10\_25031000

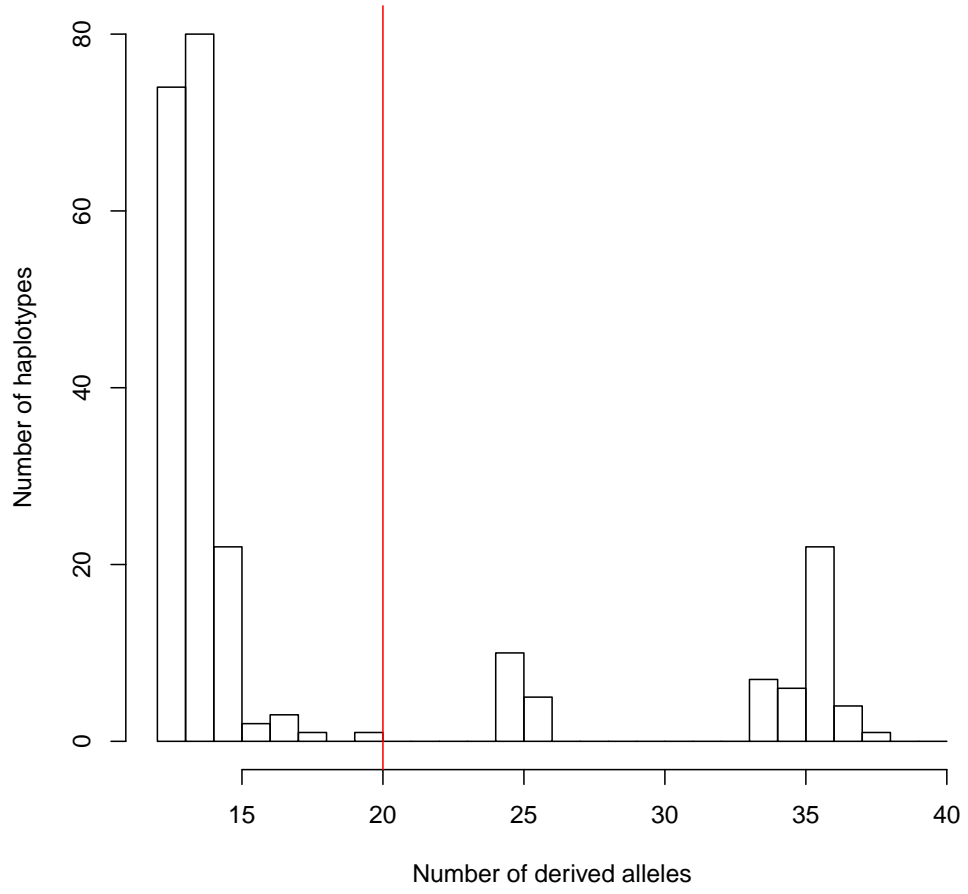

11\_1399000

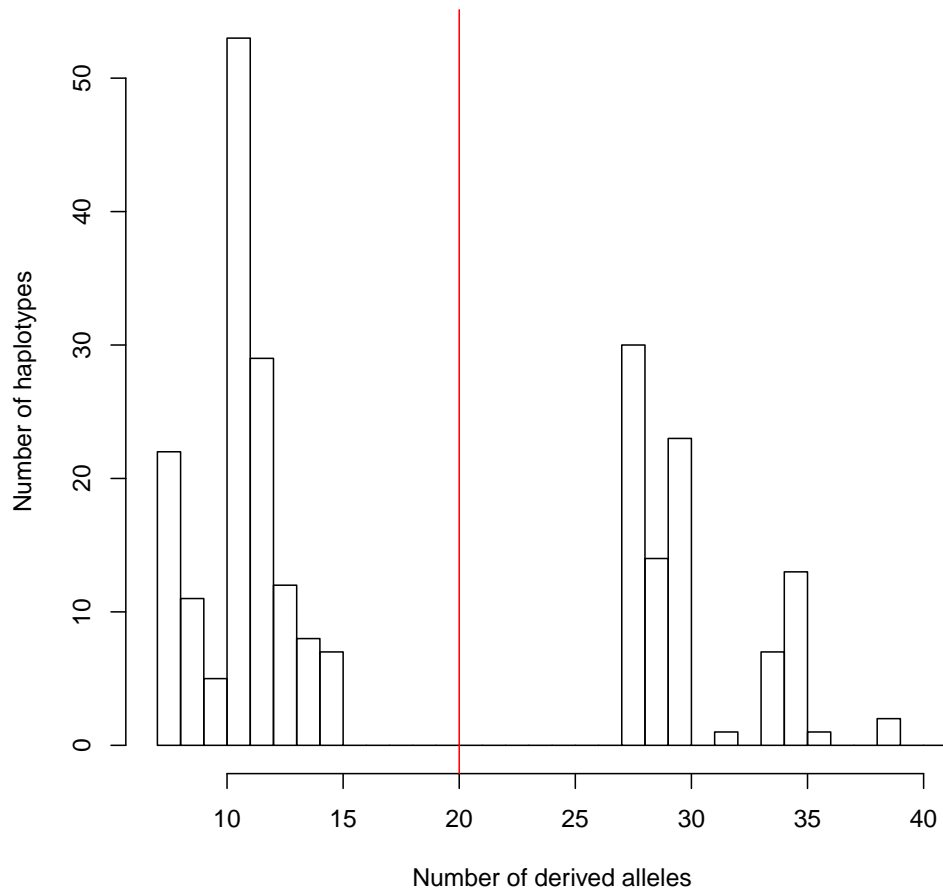

12\_44619000

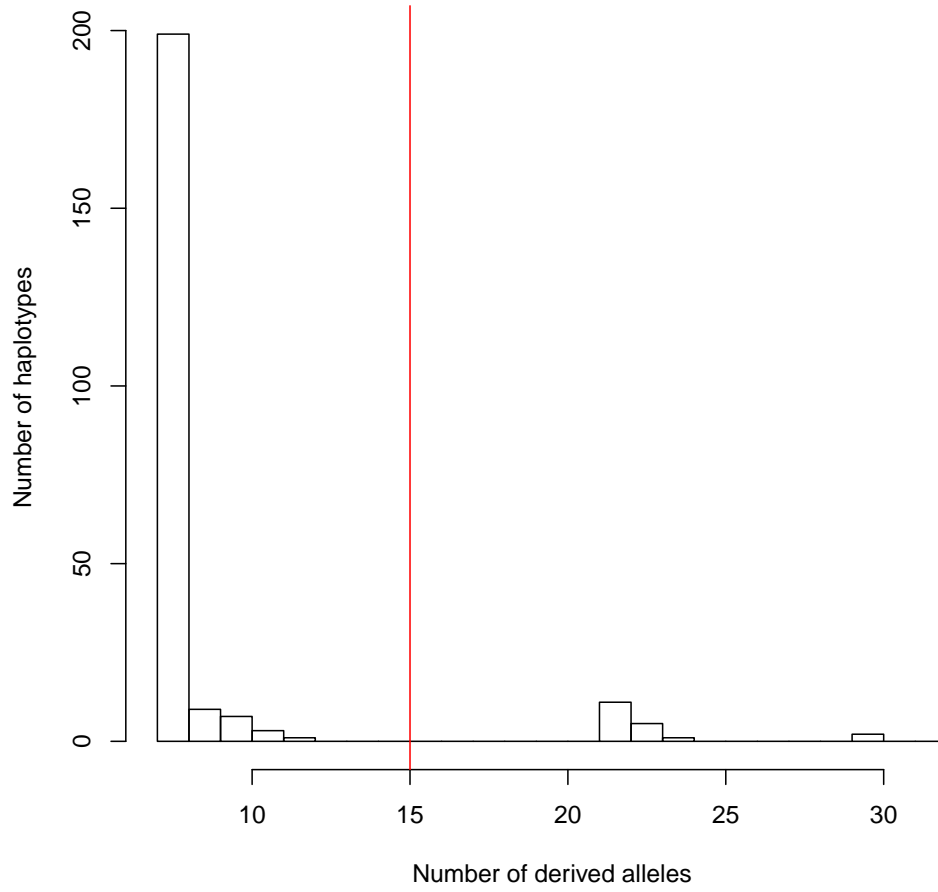

12\_87448000

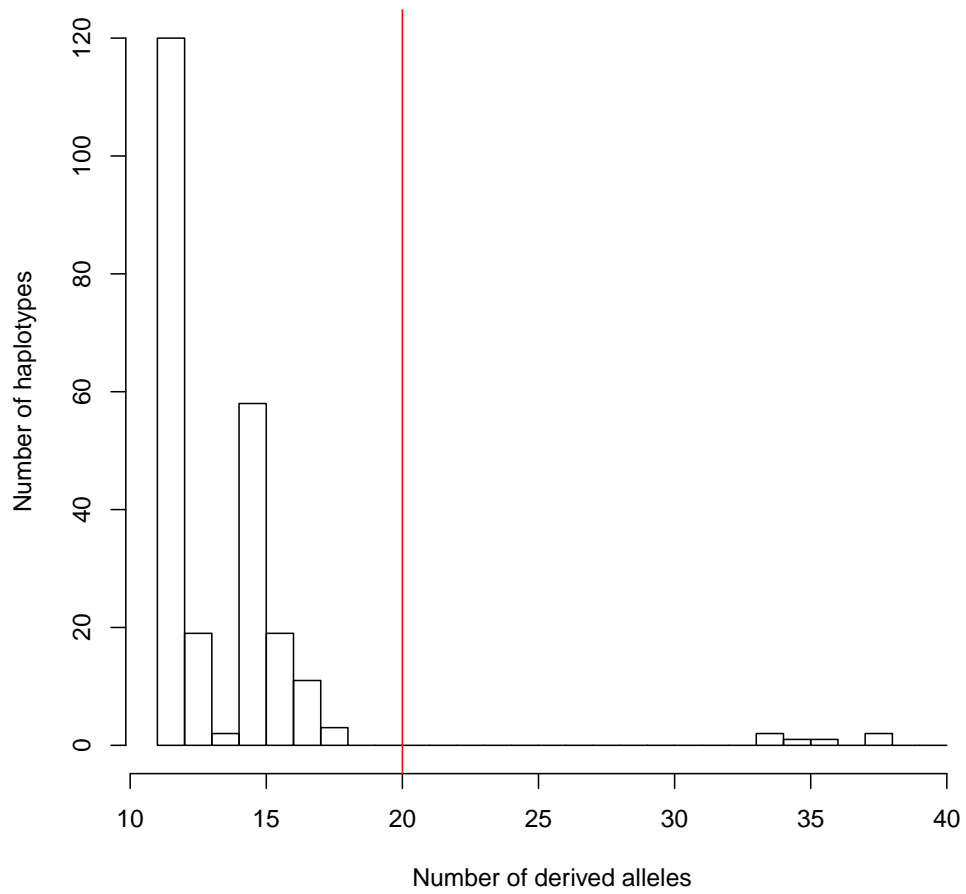

12\_96533000

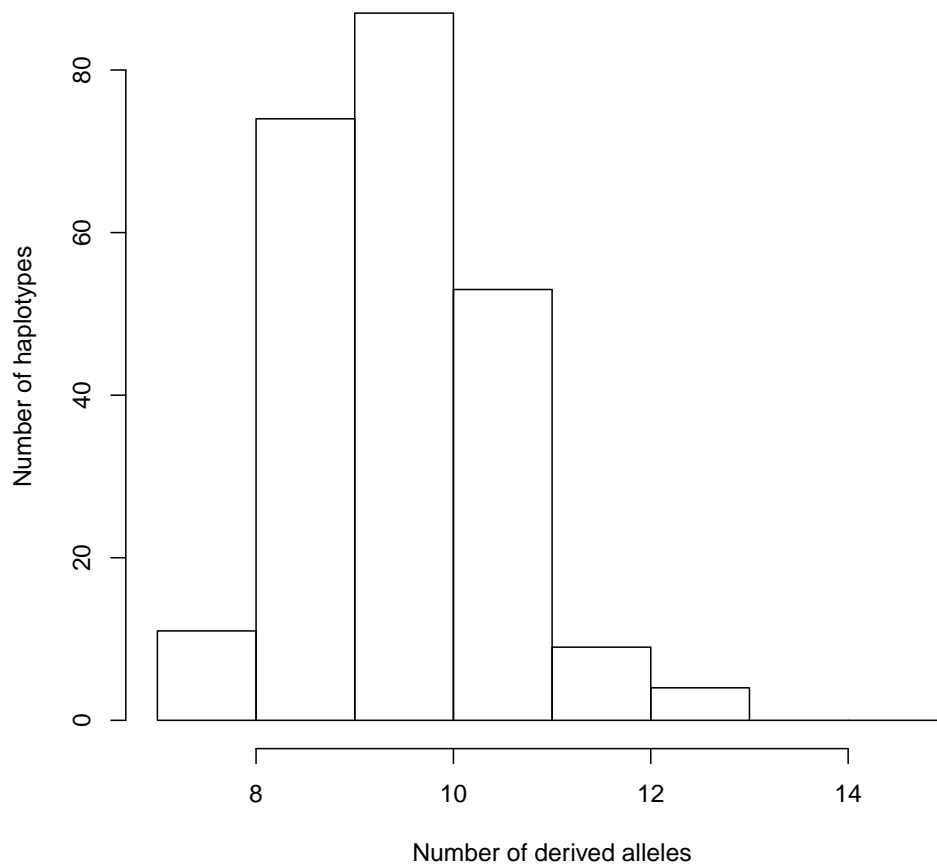

12\_99859000

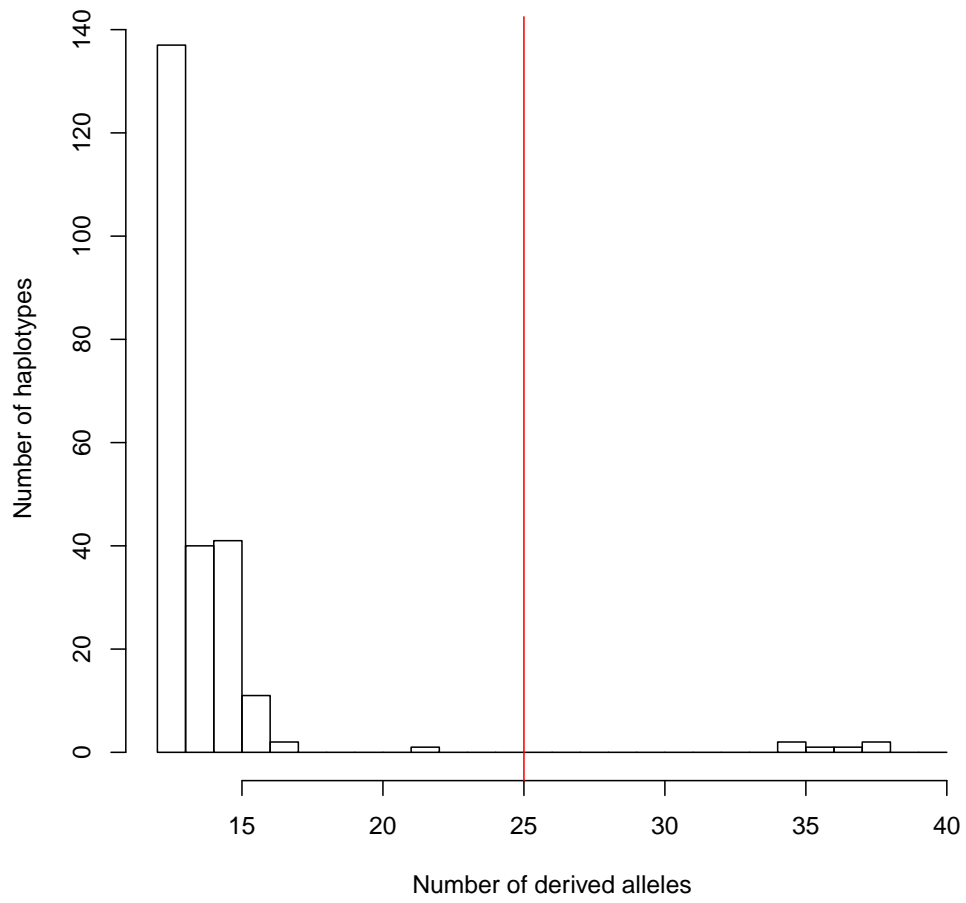

14\_90442000

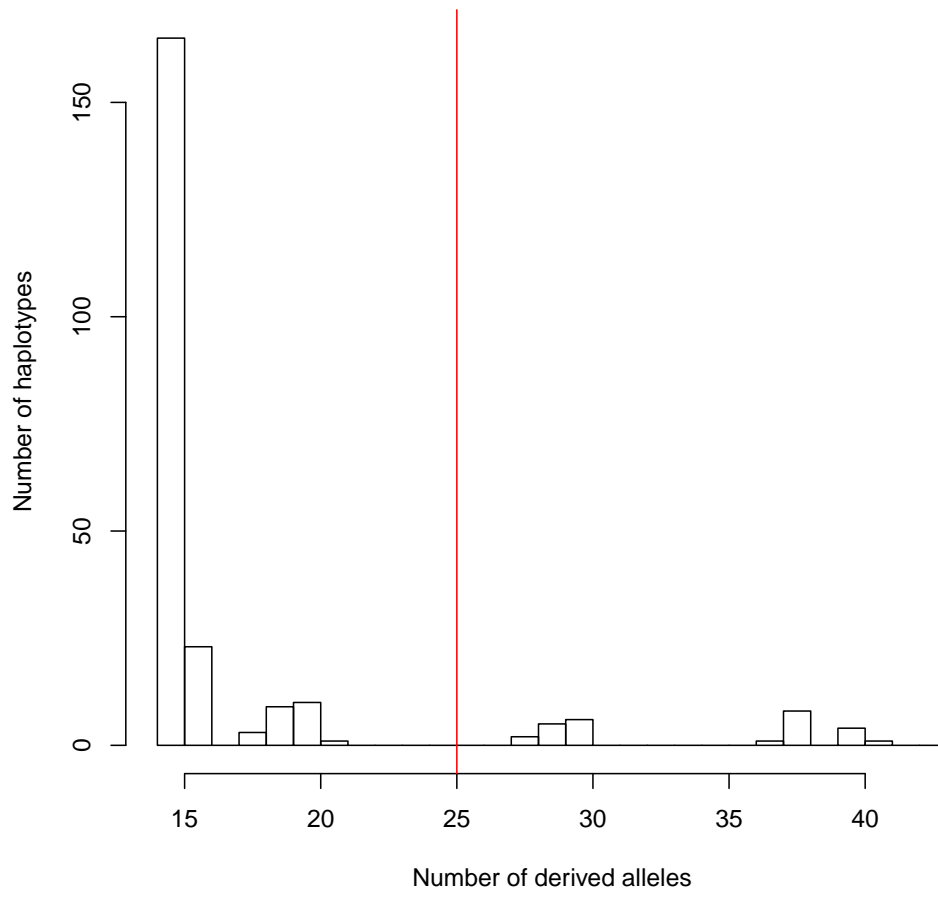

16\_32379000

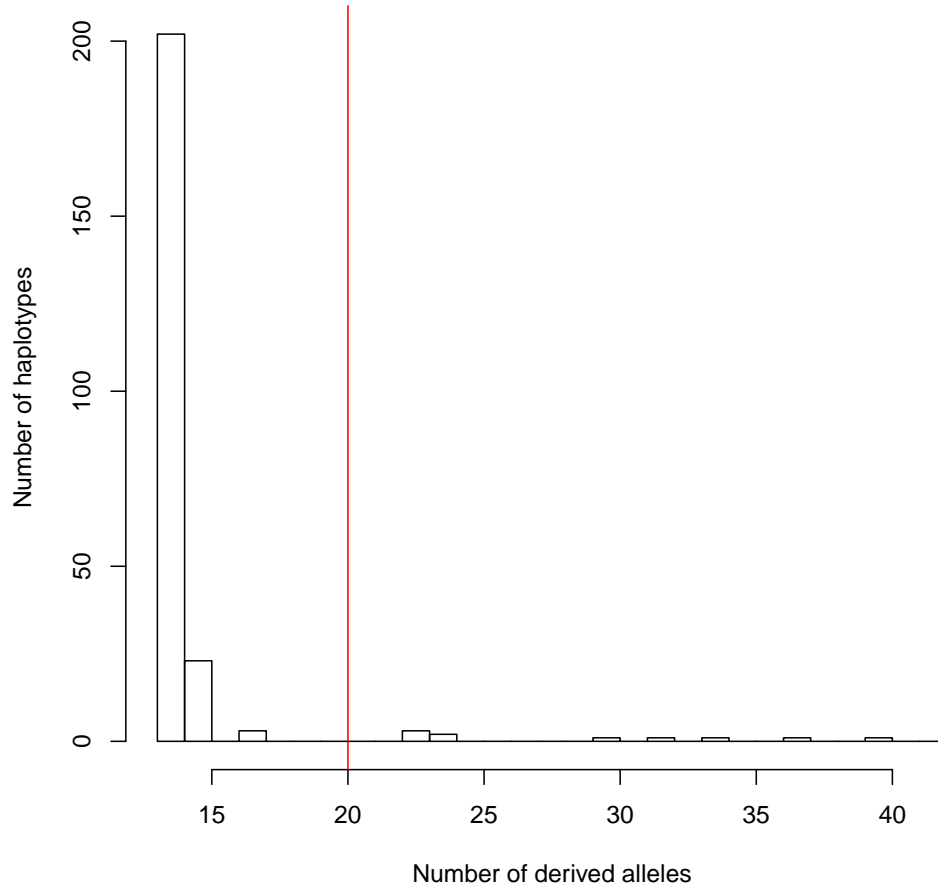



17\_15866000

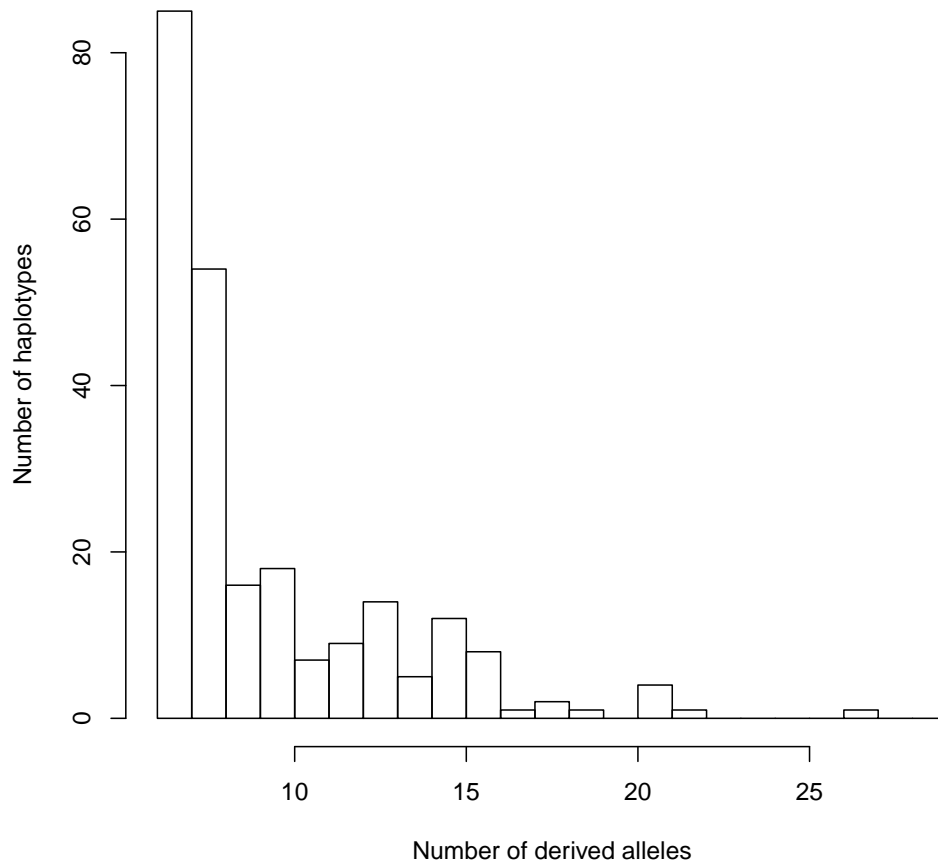

18\_15301000

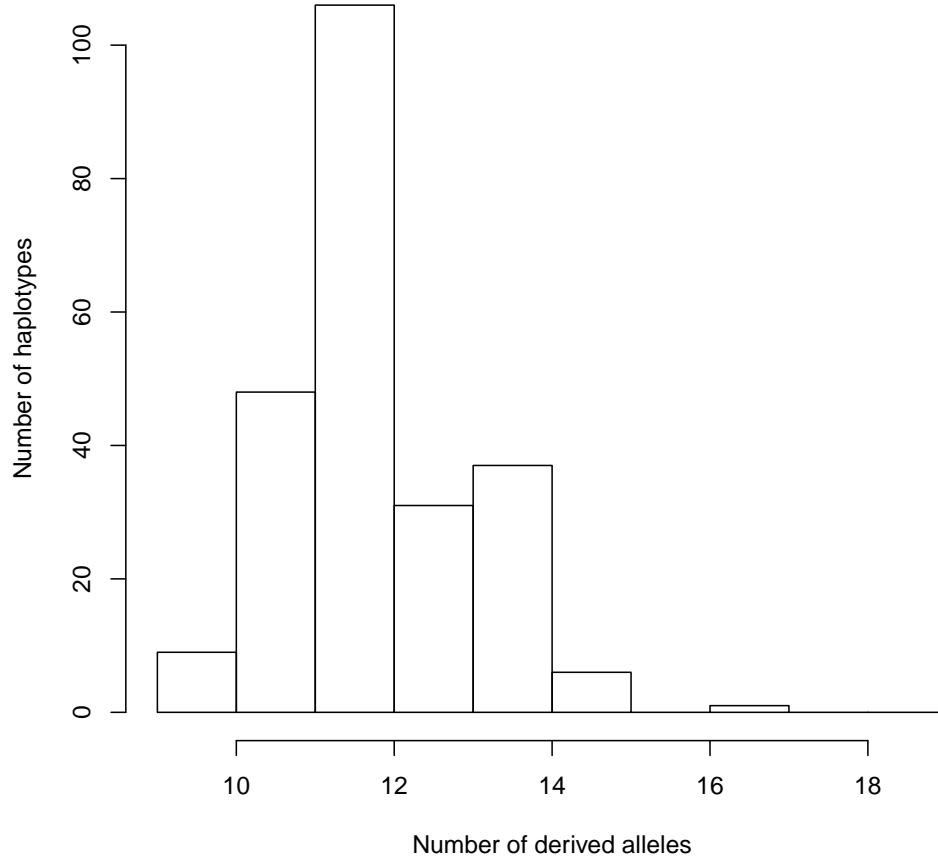

18\_24477000

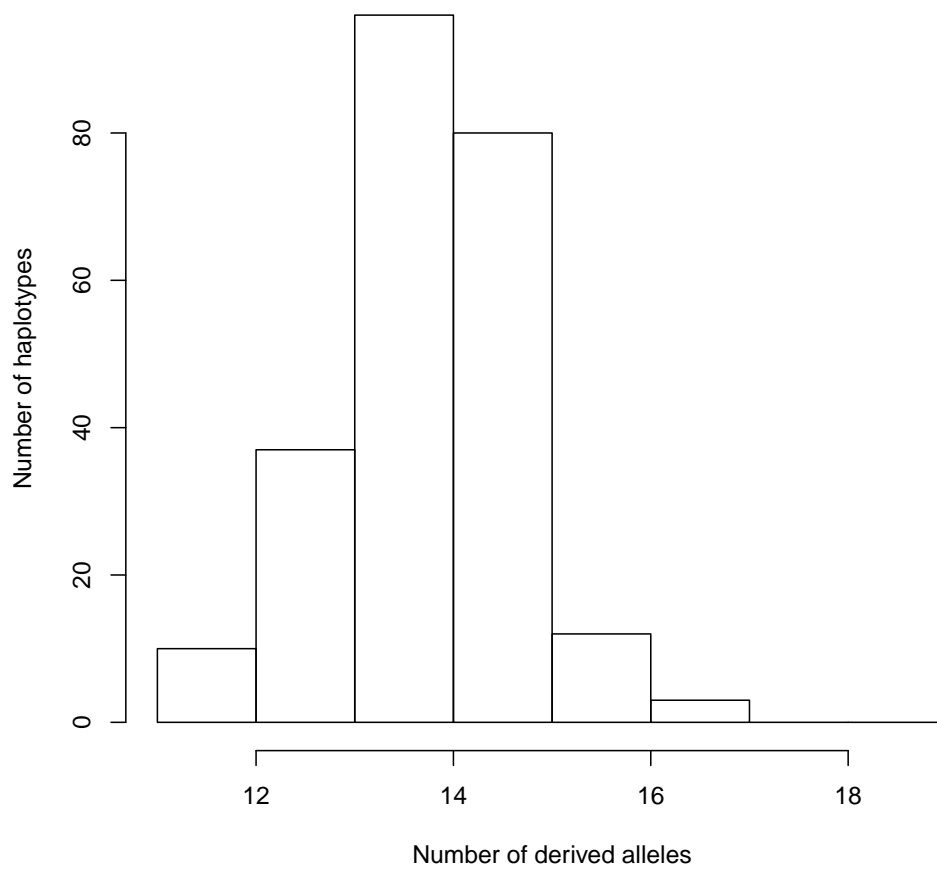

1\_192611000

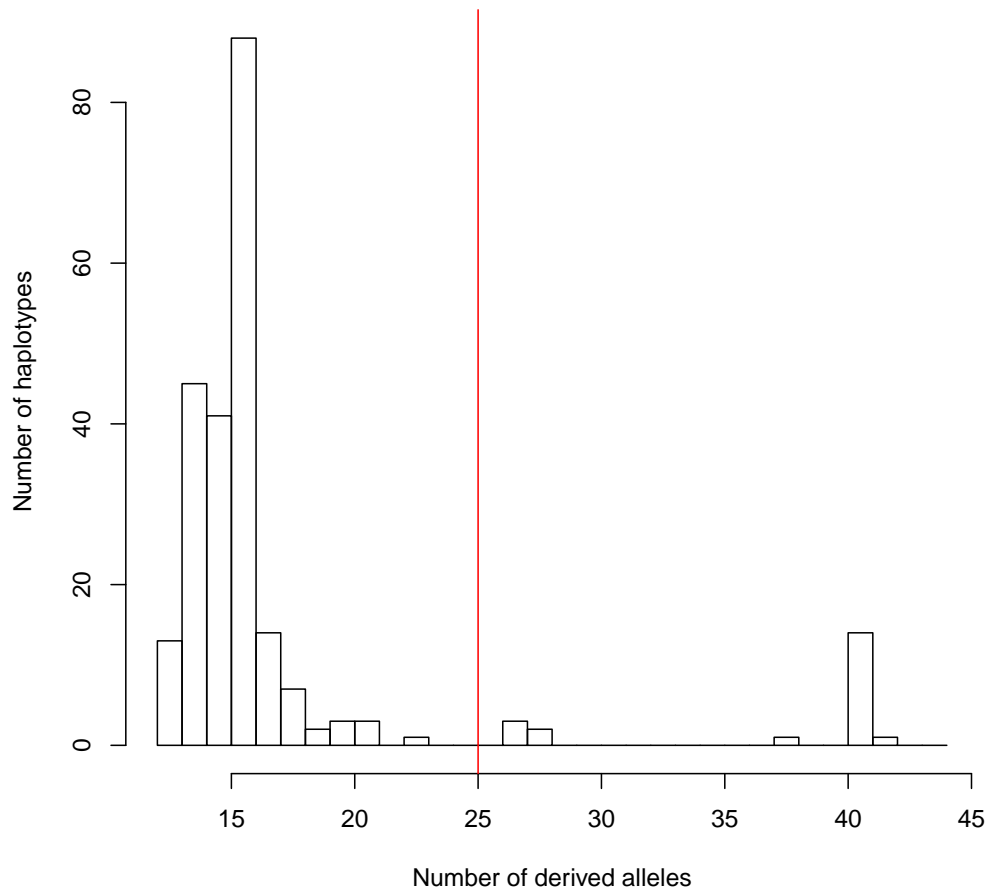

1\_202403000

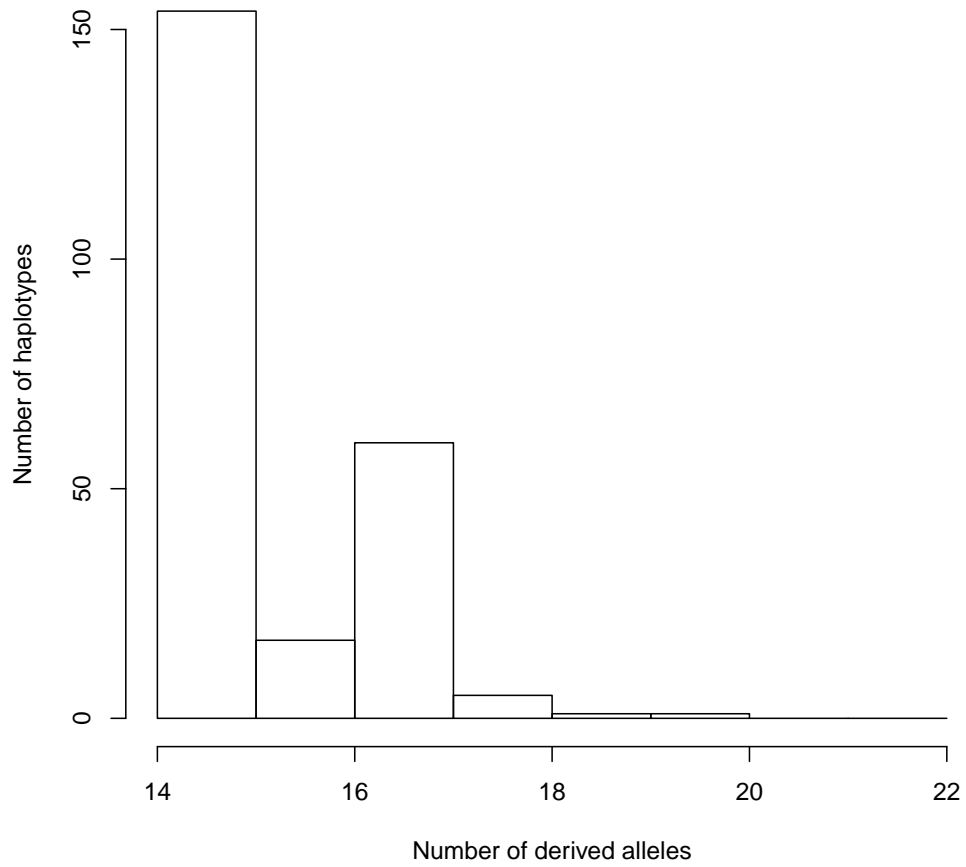

21\_2415000

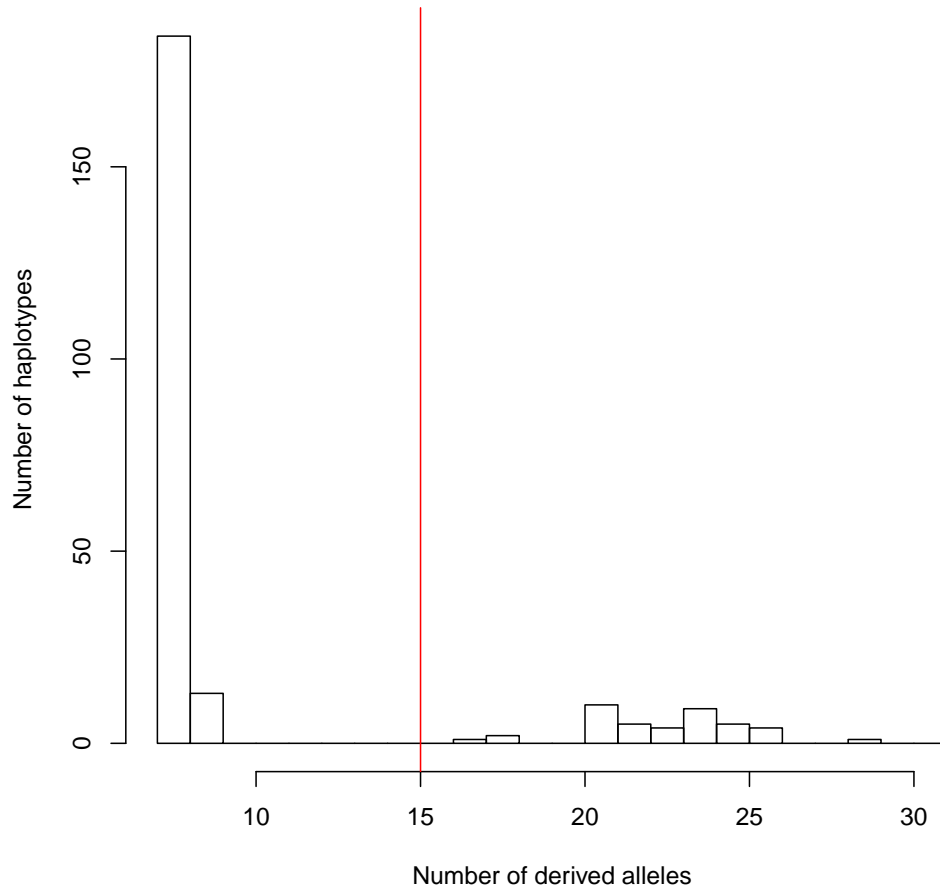

2\_17992000

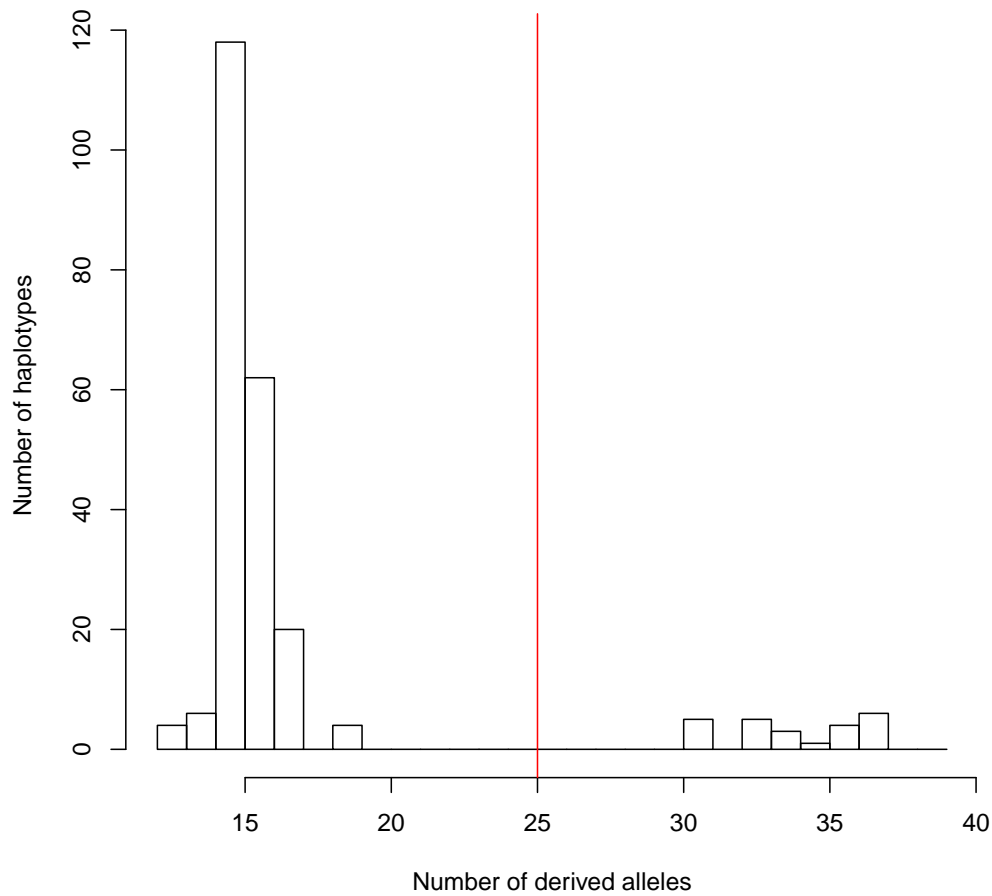

5\_17349000

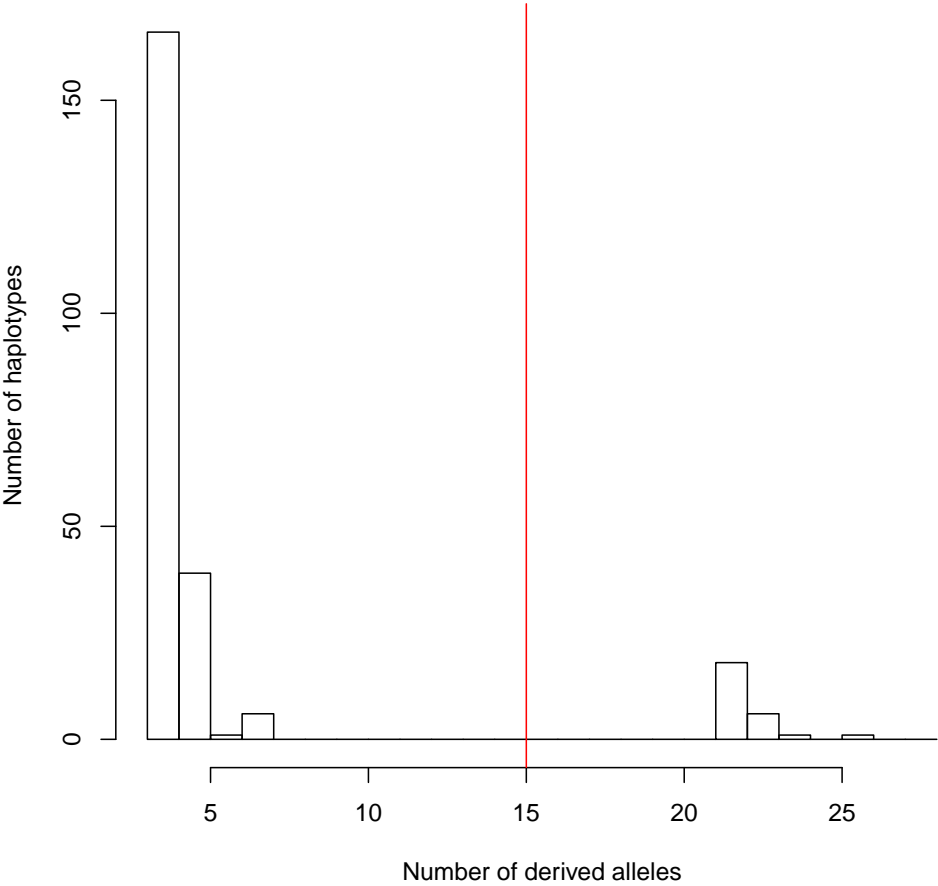



6\_114211000

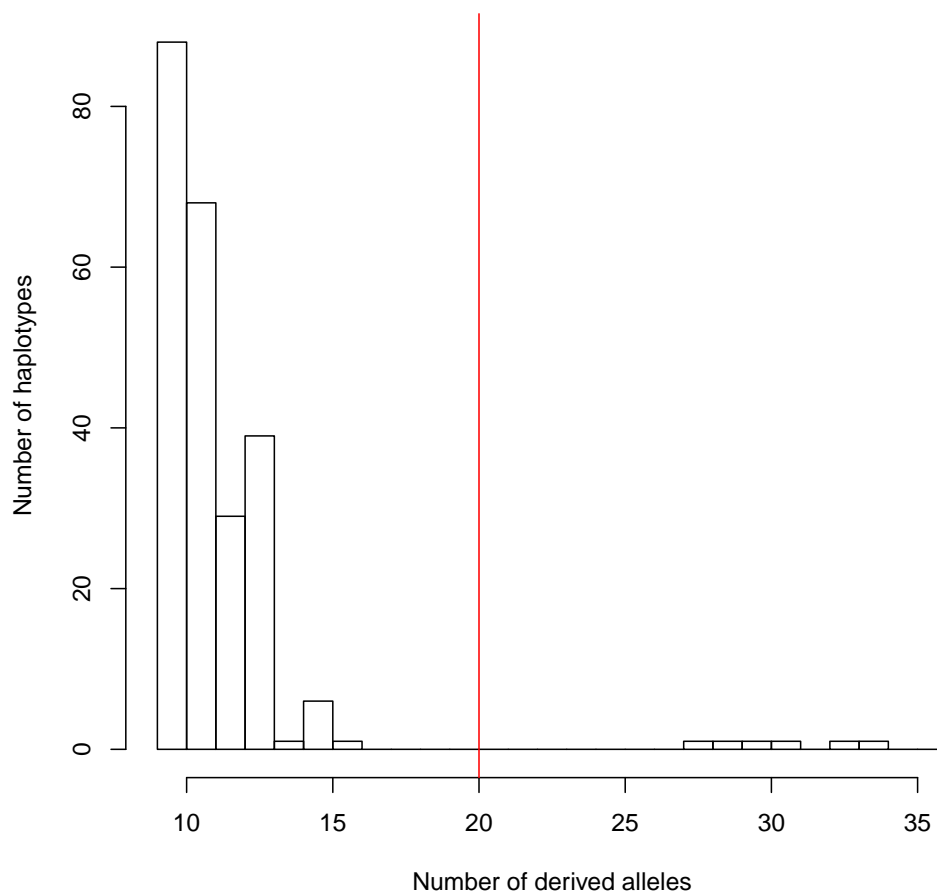

6\_130907000

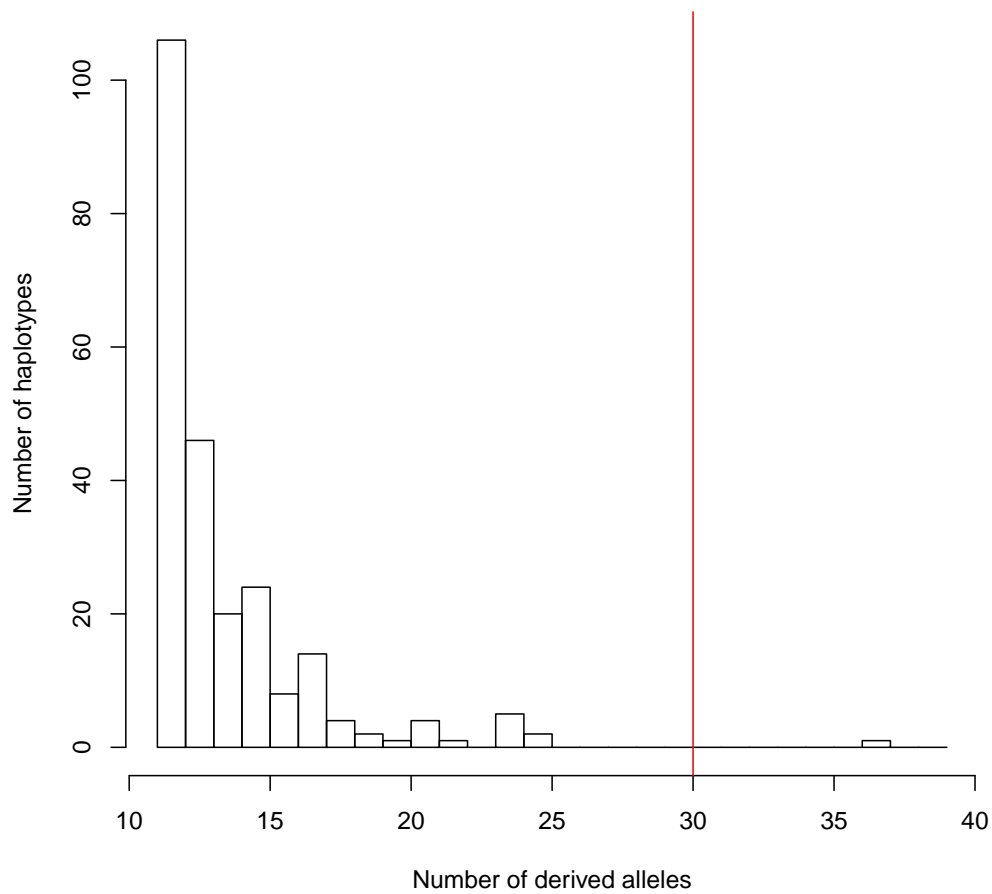

**8\_140118000**

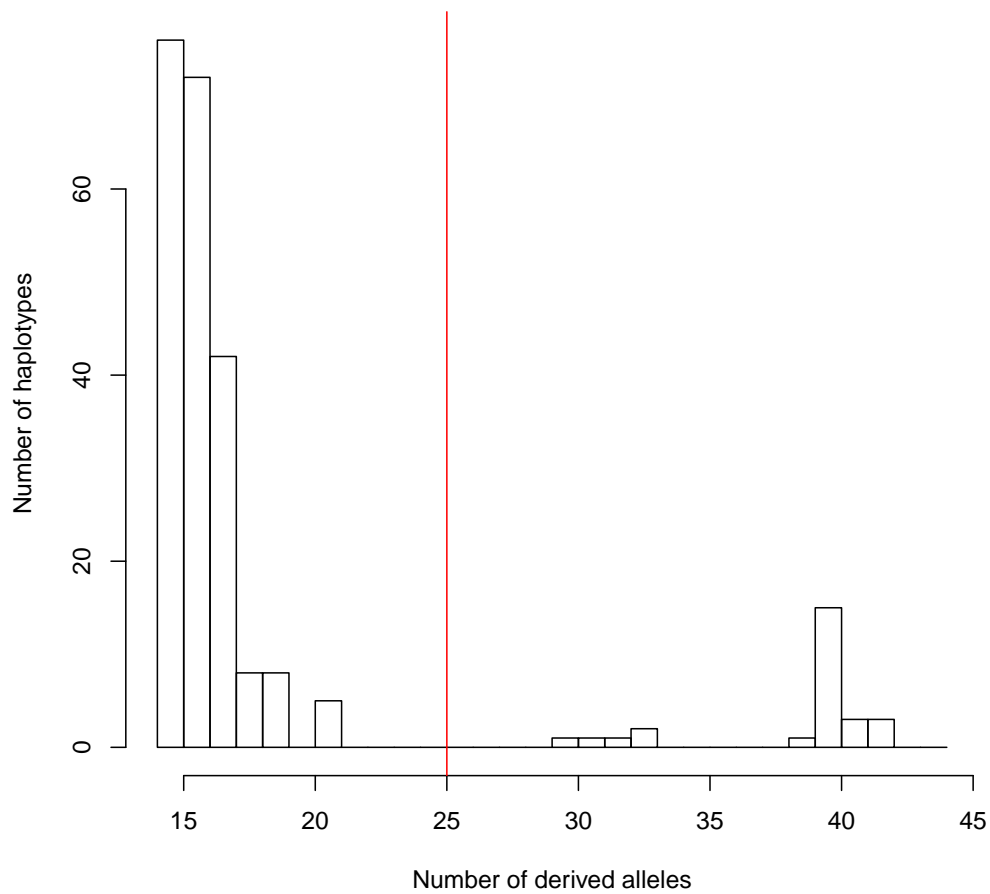

**8\_41985000**

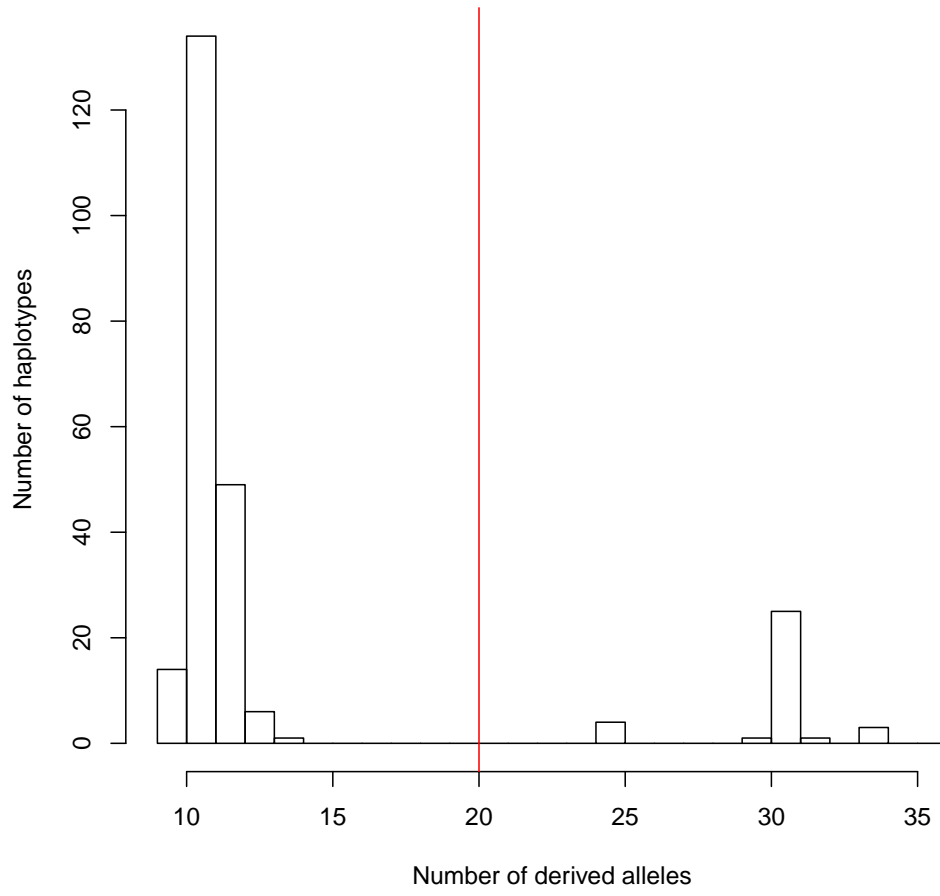

Supplement: pgen.1006549.s008.pdf [file pgen.1006549.s008.pdf]
