# Supplementary material for: Inference of Candidate Germline Mutator Loci in Humans from Genome-Wide Haplotype Data
Source: PubMed Central journal article supplement (PMC5283766; doi:10.1371/journal.pgen.1006549), 2017-01-17

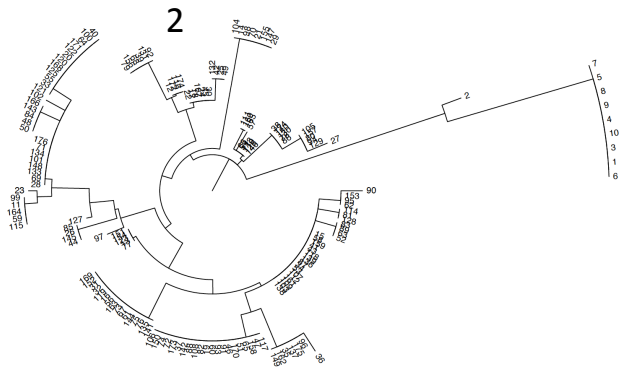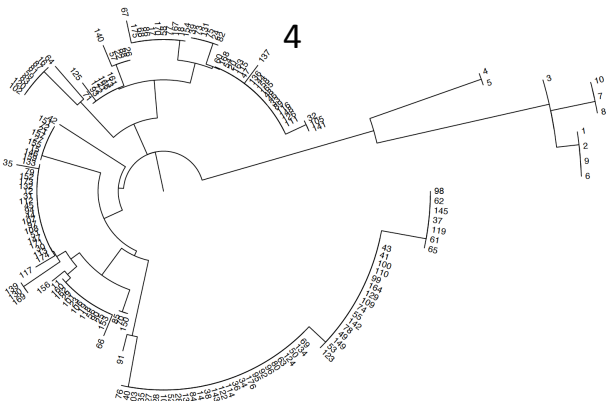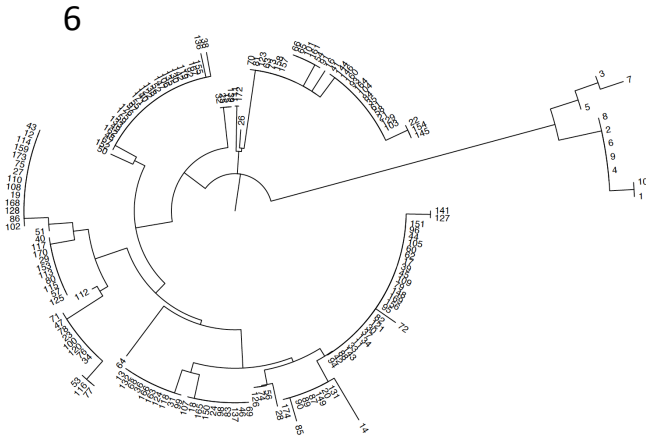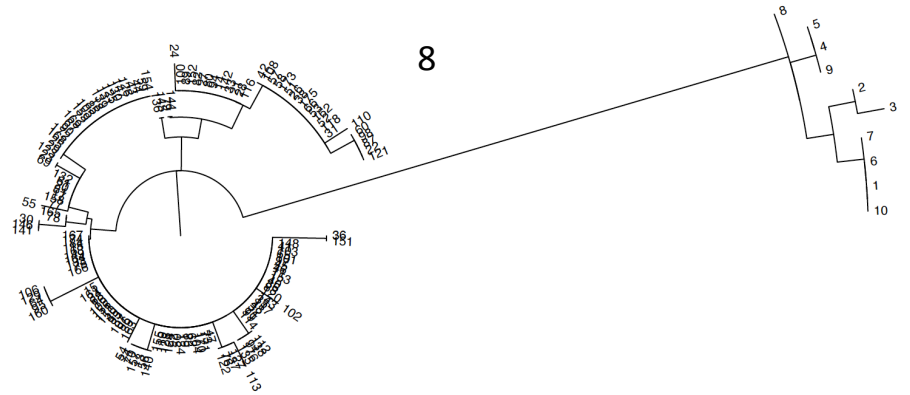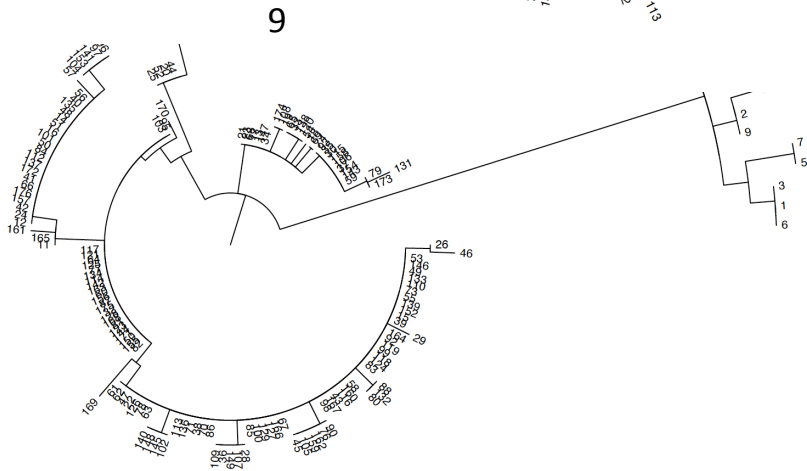

Supplement: pgen.1006549.s004.pdf [file pgen.1006549.s004.pdf]
