# Supplementary material for: Inference of Candidate Germline Mutator Loci in Humans from Genome-Wide Haplotype Data
Source: PubMed Central journal article supplement (PMC5283766; doi:10.1371/journal.pgen.1006549), 2017-01-17

Chromosome 14

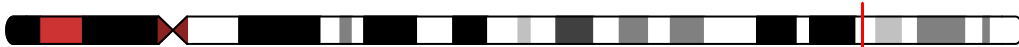

90.435 mb

90.445 mb

90.455 mb

90.44 mb

90.45 mb

Gene Models

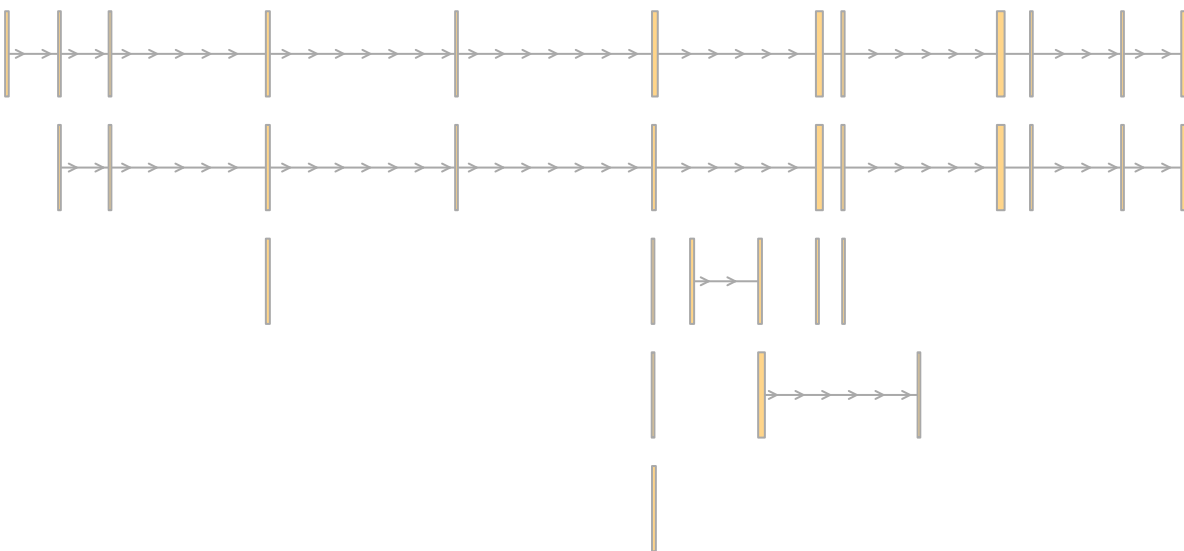

Residual

15

10

5

0

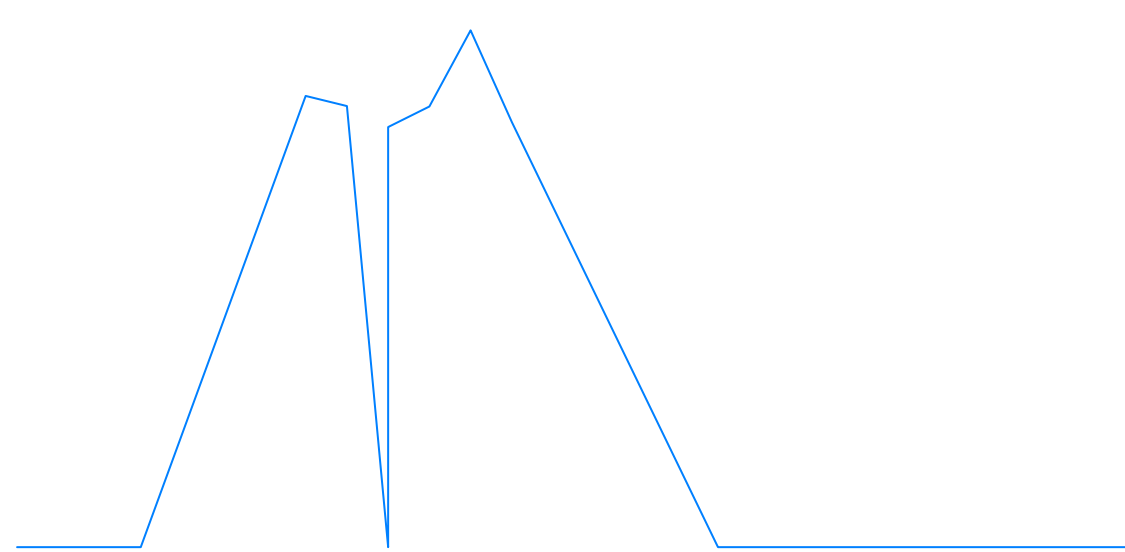

Supplement: pgen.1006549.s007.pdf [file pgen.1006549.s007.pdf]
